1  
2  
3  
4  
5  
6  
7  
8  
9  
10  
11  
12  
13  
14  
15  
16  
17  
18  
19  
20  
21  
22  
23  
24  
25  
26  
27  
28  
29  
30  
31  
32  
33  
34  
35  
36  
37  
38  
39  
40  
41  
42  
43  
44

Ankyrin domain encoding genes resulting from an ancient horizontal transfer are functionally integrated into developmental gene regulatory networks in the wasp *Nasonia*

**Daniel Pers<sup>1</sup> and Jeremy A. Lynch<sup>&,1</sup>**

<sup>1</sup>Department of Biological Sciences, University of Illinois at Chicago, Chicago, IL, USA

<sup>&</sup>Author for correspondence

Jeremy A. Lynch  
University of Illinois at Chicago  
MBRB 4020  
900 S. Ashland Ave  
Chicago, IL 60607  
312-996-5460  
jlynch42@uic.edu

45

## 46 **ABSTRACT**

### 47 **Background**

48           How and why regulatory networks incorporate additional components, and how  
49 novel genes are maintained and functionally integrated into developmental processes  
50 are two important and intertwined questions whose answers have major implications for  
51 the evolution of development. We recently described a set of novel genes with robust  
52 and unique expression patterns along the dorsal-ventral axis of the embryo of the wasp  
53 *Nasonia*. Given the unique evolutionary history of these genes, and their apparent  
54 integration in to the dorsal-ventral (DV) patterning network, they are collectively an  
55 excellent model to study the evolution of regulatory networks, and the fates of novel  
56 genes.

### 57 **Results**

58           We have found that the novel DV genes are part of a large family of rapidly  
59 duplicating and diverging ankyrin domain encoding genes that originated most likely by  
60 horizontal transfer from *Wolbachia* in a common ancestor of the wasp superfamily  
61 Chalcidoidea. We tested the function of those ankyrin encoding genes expressed along  
62 the DV axis and found that they participate in early embryonic DV patterning. We also  
63 developed a new wasp model system (*Melittobia*) and found that some functional  
64 integration of ankyrin genes have been preserved for over 90 million years, while others  
65 are lineage specific.

### 66 **Conclusions**

67           Our results indicate that regulatory networks can incorporate novel genes that  
68 then become necessary for stable and repeatable outputs. Even modest role in

69 developmental networks may be enough to allow novel or duplicate genes to be  
70 maintained in the genome and become fully integrated network components.

71

## 72 **KEYWORDS**

73 Regulatory networks, Development, EvoDevo, Ankyrin, Chalcidoidea, *Nasonia*,  
74 dorsoventral patterning, embryo, *Wolbachia*, gene duplication, Horizontal Gene Transfer

## 75 **Background**

76 Gene regulatory networks (GRNs) coordinate the expression of mRNA and  
77 proteins in a spatiotemporal manner to bring about a specific developmental output [1].

78 The complex webs of interacting nodes and modules that make up GRNs are vital for  
79 establishing patterning, morphogenesis, and ultimately an organism's body plan [2].

80 Perturbations to these networks should result in novel developmental outputs. However,  
81 canalization and developmental redundancy can conceal underlying genetic variation  
82 and phenotypic plasticity. This quality enables GRNs to weather large variations in  
83 genomic and environmental inputs, without disrupting the phenotypic output of the  
84 network [3-6].

85 These properties of GRNs raise questions about how developmental  
86 mechanisms can evolve. Since robust networks can absorb large genetic changes  
87 without causing major changes in developmental output, it seems that a large threshold  
88 must be overcome in order to achieve a new phenotype [7]. Thus, robustness  
89 paradoxically may make GRNs less able to respond to evolutionary pressures, since  
90 most mutations will not produce phenotypes visible to natural selection. Thus, we might  
91 expect robust developmental GRNs to be mostly static in evolutionary time in the

92 absence of major phenotypic change. However, there are many well known examples  
93 where developmental processes have been apparently unchanged, while the molecular  
94 basis of development is highly diverged [8-10]

95 Whether these changes are fixed because they provide some selectable  
96 improvement on the developmental process of interest, are indirect responses to  
97 selection on modules that are reused in other developmental processes, or are random  
98 is not well characterized. The development of methods to circumvent the candidate  
99 gene approach in a very wide variety of species facilitates comprehensive  
100 characterization of developmental GRNs at high phylogenetic resolution. This can allow  
101 hypotheses about the evolution of development to be tested robustly, and will lead to a  
102 deep understanding of the pattern and process of GRN evolution.

103 The GRN that patterns the embryonic dorsoventral (DV) axis of the wasp  
104 *Nasonia vitripennis* has been shown to be a good model to study novelty and the  
105 evolution of gene networks. Having split from *Drosophila melanogaster* over 300 MYA  
106 [11], the two have converged on a similar mode of embryogenesis [12], and share a  
107 nearly identical expression of tissue-specific marker genes just prior to gastrulation [13].  
108 We have previously shown that most genes differentially expressed along the DV axis  
109 of the *Nasonia* embryo are not conserved components of the *Drosophila* DV GRN,  
110 making the comparison between the fly and wasp DV GRNs an ideal system for  
111 understanding how GRNs evolve while producing similar patterning results [14, 15].

112 A particularly interesting case of *Nasonia* specific DV GRN components are a set  
113 of 15 ankyrin domain containing genes, which do not have clear orthologs in *Drosophila*  
114 or in any other insects outside of the Superfamily Chalcidoidea. In fact, there is

115 evidence that these genes entered the genome of the ancestor of *Nasonia* through at  
116 least one horizontal gene transfer (HGT) event, followed by several waves of duplication  
117 and divergence. We have previously shown that these ankyrin domain encoding genes  
118 are expressed in specific patterns along the DV axis [15], and here we demonstrate that  
119 they also are functionally incorporated into the DV patterning GRN, and their loss leads  
120 to variable disruptions to patterning. Through examination of another wasp, *Melittobia*  
121 *digitata*, we also show that some of the functional incorporation is ancient within the  
122 Superfamily, while there is also strong evidence of recent gains and/or losses of  
123 function in the *Nasonia* and *Melittobia* lineages.

124 We propose that the properties of ankyrin domain containing proteins allow them  
125 to rapidly gain interaction partners, and potentially adaptive functions in developmental  
126 networks, which increases the likelihood that genes of this type will be maintained and  
127 sometimes multiply in the course of genome evolution.

128

## 129 **Results**

### 130 **Identification of new families of apparently horizontally transferred, ankyrin** 131 **domain encoding, genes**

132 In our previous study we identified fifteen transcripts encoding ankyrin domain  
133 proteins that appeared to be significantly regulated by the Toll and/or BMP signaling  
134 pathways in the *Nasonia* embryo [15]. Further analysis of their expression showed that  
135 6 of these genes are expressed laterally, 3 are expressed on the dorsal surface of the  
136 embryo, one is expressed over the ventral midline, one has a complex pattern involving

137 late expression in dorsal tissues, and 4 with no clear differential expression along the  
138 DV axis (described in more detail below).

139 Our previous analysis indicated that four of these 15 genes possess a PRANC  
140 (**P**ox proteins **R**epeats of **A**nkyrin, **C**-terminal) domain at their C-termini. PRANC  
141 domains were originally described in Pox viruses. They were first described in a  
142 eukaryotic system upon the publication of the *Nasonia* genome, where a set of PRANC  
143 domain encoding genes were found to be integrated into the genome, and which are  
144 highly similar PRANC domain proteins in their endosymbiotic bacteria, *Wolbachia*[16,  
145 17]. The similarity (both in the PRANC domains, and their association with ankyrin  
146 repeats) of the PRANC encoding genes integrated into the *Nasonia* genome to those  
147 found in the *Wolbachia* genome led to the hypothesis that the *Nasonia* PRANC genes  
148 originated from a HGT from *Wolbachia*.

149 While the remaining 11 DV regulated ankyrin domain encoding genes do not  
150 appear to have PRANC domains, we believe that they entered the *Nasonia* genome  
151 through similar processes of horizontal transfer, gene duplication and rapid molecular  
152 divergence.

153 If we focus on BLASTp searches using any of the 15 *Nasonia* DV ankyrin domain  
154 genes as queries against well annotated genomes from *D. melanogaster* or *Apis*  
155 *meliferra* the results are invariably "canonical" ankyrin genes (i.e., *ankyrin-1* or *ankyrin-*  
156 *2*), that are highly conserved in all insect species. As expected, *Nasonia* possesses  
157 clear direct orthologs to such canonical ankyrin genes that are highly conserved at the  
158 amino acid level and these gene families are clearly distinct from the genes we propose  
159 are horizontally transferred (Additional File 1 and 2).

160 Additional evidence that these genes originated outside of the normal course of  
161 vertical transmission from generation to generation is the pattern of unrestricted  
162 BLASTp results and the phylogenetic relationships of the top 100 protein BLAST hits for  
163 each *Nasonia* ankyrin (Additional File 3) which do not follow expected phylogenetic  
164 patterns (i.e., stronger hits throughout the hymenoptera, then hits in Diptera,  
165 Coleoptera, Lepidoptera, other insects, etc...), that are observed for the canonical  
166 ankyrin genes.

167 As would be expected, the top hits for most of the 15 *Nasonia* sequences come  
168 from *Trichomalopsis* (a sister genus to *Nasonia*), except one where there is a recent  
169 *Nasonia* paralog almost identical to it (Additional File 3). This indicates that the  
170 ancestors of the 15 DV regulated ankyrin genes were present in the common ancestor  
171 of the *Nasonia* and *Trichomalopsis* genera. In addition, sequences from the fig wasp  
172 *Ceratosolen solmsi* [18], *Copidosoma floridanum* and *Trichogramma pretiosum* [19]  
173 (representing the Families Agaonidea, Encyrtidae, and Trichogrammitidae within the  
174 Superfamily Chalcidoidea, respectively) are among the top hits for most of the *Nasonia*  
175 proteins, and cluster near to the *Nasonia* query sequence in the phylogenies (Additional  
176 File 3).

177 Outside of the chalcid wasps, strong hits are scattered across the tree of life.  
178 Taxa with proteins showing strong similarity to each *Nasonia* DV ankyrin gene include  
179 the ant *Pseudomyrmex gracilis*, the single celled eukaryote *Trichomonas vaginalis*, the  
180 bee *Ceratina capitata*, the sea urchin *Strongylocentrotus purpuratus*, and the amoeba  
181 endosymbiont *Candidatus Amoebophilus asiaticus* [20]. Other taxa occur with less  
182 frequency, including *Wolbachia* sequences (Additional File 3). Importantly, canonical

183 ankyrins from *Nasonia* or other insect species do not appear among the top hundreds of  
184 hits and do not cluster with our genes of interest in phylogenies.

185 We attempted to phylogenetically analyze the *Nasonia* DV-ankyrin genes in the  
186 context of their best blast hits in other animals and microbes to see if they cluster with  
187 prokaryotic or canonical eukaryotic ankyrin sequences. However, we found that  
188 aligning our relatively small, rapidly evolving proteins with proteins encoding varying  
189 numbers of ankyrin domains of varying conservation made phylogenetic analyses  
190 difficult, and in our hands uninformative (not shown).

191 Instead, we decided to focus on the regions C-terminal to the ankyrin repeats in  
192 the *Nasonia* DV ankyrin domain genes. These regions range from ~100-200 amino  
193 acids, except in two sequences (-D and -E), which lack C-terminal sequence beyond the  
194 ankyrin domains. We knew that this region was predicted to contain a PRANC domain  
195 in four of our DV ankyrin proteins, but we did not know how similar to sequences  
196 outside of the wasps it would be. We also hypothesized that the remaining C-termini  
197 maintained cryptic similarity to the ancestral PRANC domain.

198 Because the C-termini of our DV ankyrin domain genes seem to be less well  
199 conserved, we used the more sensitive, iterative PSI-BLAST [21] approach to identify  
200 similar sequences in the NCBI nonredundant (nr) database. We used default  
201 parameters, including only using genes that were above the threshold in round one as  
202 templates to generate the pattern for the second-round search. We then took all of the  
203 aligning sequences that were above the significance threshold given by PSI-BLAST and  
204 subjected them to phylogenetic analysis. We only discuss genes that were above the  
205 threshold in the second round (with the exception of Nv-CLANK-L, which required 4



206 rounds), as this was sufficient to identify the first non-insect and microbial sequences.  
207 DV ankyrins -D, and -E were not analyzed as they lack sequence C-terminal to the  
208 ankyrin domains.

209         The taxa that appear in these queries are much more limited than what was  
210 found using the full DV ankyrin protein sequences as queries, indicating that complexity  
211 of aligning the constrained and repetitive ankyrin domains can indeed give spurious  
212 signals of homology. The close relationship of *Nasonia* DV ankyrins and other orphan  
213 ankyrin domain encoding genes in Chalcidoidea is accentuated, as multiple sequences  
214 from *Ceratosolen*, *Copidosoma*, and *Trichogramma* cluster more robustly with large  
215 numbers of *Nasonia* sequences in this analysis (Figure 1A, for example, Additional File  
216 4). We also find sequences from species that also showed up strongly when using the  
217 full protein as a query, particularly from the ant *Pseudomyrmex* and bee *Ceratina*. We  
218 also find a large number of hits from the Braconid wasp *Microplitis demolitor* and the  
219 whitefly *Bemisia tabaci* in all PSI-BLASTs. The sequences from these insects cluster  
220 closely with others from the same species, and also with particular *Wolbachia*  
221 sequences (Figure 1B, for example, Additional File 4), again indicating recent HGT in  
222 these organisms.

223         Outside of these insect hits were primarily from prokaryotes and some  
224 poxviruses. *Wolbachia* species had the strongest and most common prokaryotic hits,  
225 but many *Orientia* (a Rickettsial intracellular parasite where PRANC domains were also  
226 found in the *Nasonia* genome publication [17]) sequences were also found (Additional  
227 File 4). The e-values of *Wolbachia* hits ranged from E-05 to E-60 (Fig. 1C, for  
228 example). Importantly, all of the hits aligned to the C-terminal region of small *Wolbachia*

229 proteins that also have ankyrin domains toward the N-terminus. Some of the hits in  
230 these analyses are annotated as PRANC domains, but the majority of them are not,  
231 despite highly significant similarity.

232 Overall, these results strongly indicate that the ankyrin domain containing genes  
233 that were identified in the PSI-BLAST analyses have a common history, despite the fact  
234 that they occur in a scattered phylogenetic distribution in a few insect lineages,  
235 intracellular bacteria, and viruses. We find it extremely unlikely that these proteins with  
236 conserved C-terminal, PRANC-like motifs that are directly downstream from relatively  
237 well conserved ankyrin domains, would have evolved convergently by chance multiple  
238 times.

239 Rather, we believe that the pattern we uncovered indicates multiple instances of  
240 HGT: At least four recent ones in lineages leading to *Pseudomyrmex*, *Bemisia*,  
241 *Ceratina*, and *Microplitis*, and one ancient one in a common ancestor of the superfamily  
242 Chalcidoide (around 150 million years ago [22]). We propose to name this later family of  
243 proteins **Chalcidoidea Lineage specific ANKyrin domain encoding genes (CLANKs)**.  
244 We will henceforth discuss the DV ankyrin domain proteins as *Nasonia vitripennis*  
245 CLANKs (*Nv*-CLANK) -A through -O. The relationships between our CLANK  
246 nomenclature and gene identification numbers in different annotations are given in  
247 Additional File 5.

248 While we strongly favor the hypothesis that the CLANKs entered the genomes of  
249 Chalcid wasps through HGT based on the evidence given above, the complex  
250 relationships and genetic exchange back and forth among prokaryotes, viruses and  
251 eukaryotes [16, 20, 23], make proving this idea beyond a shadow of a doubt a daunting

252 task, well beyond the scope of this manuscript. Whatever the case, CLANKs are new  
253 genes in the wasps relative to the rest of the insects, and we would like to understand  
254 why they have been maintained over the course of more than 150 million years of  
255 evolution in this clade.

## 256 **Characterization of protein and genomic sequence features**

257 Characterization of the amino acid sequences and genomic context of these CLANK  
258 genes supports that this family of genes likely has a long history, and has gone  
259 extensive sequence change in the course of their evolution. These 15 genes code for  
260 18 proteins that vary in size from 255 to 717 amino acids. Most of the genes encoding  
261 *Nv-CLANKs* are interrupted by at least one intron, and they are found spread across the  
262 5 chromosomes of *Nasonia* (Fig. 2). Sequence alignment of these 15 protein sequences  
263 yielded very few residues conserved across the CLANKs [24] (data not shown).  
264 Phylogenetic analysis [25] of the DV CLANKs gives two major clades (Fig. 2). Domain  
265 analysis with Interproscan [26] confirmed the four CLANKS have officially annotated  
266 PRANC domains (*Nv-CLANK-F*, *-J*, *-N*, *-O*), and mapping these on the phylogeny  
267 shows that this domain has likely been lost or degraded beyond recognition in many  
268 lineages (Fig. 2). This analysis also showed that the number of Ankyrin repeats within a  
269 protein varies from 6 to 13 throughout the length of the proteins, except for the last  
270 ~100 amino acids, where the PRANC-like domains reside.

271 Overall, there appears to be no correlations between these genetic features and  
272 regulation, expression patterns, or phylogenetic relatedness (Fig. 2), except for the two  
273 pairs of recent paralogy (*Nv-CLANK-F* and *-N*, and *-A* and *-H*).

274

## 275 **Detailed characterization of DV CLANK embryonic expression**

276 RNA expression patterns for the 15 CLANK genes have previously been  
277 mentioned [15], but not fully described. Thus, *in situ* hybridization experiments were  
278 thus repeated and analyzed in more detail over a longer developmental time frame, and  
279 transcripts were grouped according to their expression patterns. Four CLANKS (-B, -C, -  
280 D, -J) have no patterned expression at any time in embryogenesis (Additional File 6)  
281 and will not be discussed further.

## 282 **Laterally expressed CLANKs**

283 Six of the fifteen *Nv-CLANK* transcripts are expressed in a lateral domain at one  
284 or more time points during embryogenesis; however, this expression is quite dynamic.  
285 Three *Nv-CLANKs* (-G, -H, -K) show an overall expansion of expression, while three  
286 *Nv-CLANKs* (-A, -E, -I) are characterized by a shrinking of their expression domain.

287 *Nv-CLANK-G* is ubiquitously expressed during the pre-blastoderm and early  
288 blastoderm stages of development (Fig. 3A1-32). As the blastoderm undergoes  
289 additional rounds of division and begins to cellularize, *Nv-CLANK-G* is expressed first  
290 as a band encircling the anterior end of the embryo (Fig. 3A3) and then expands  
291 posteriorly creating a gradient with highest levels in that initial anterior domain (Fig.  
292 3A4). Expansion is missing from both poles, and also from the dorsal midline of the  
293 embryo (Fig. 3A5). During gastrulation, expression is restricted to a segmental pattern  
294 in the cells that give rise to the central nervous system (CNS) (Fig. 3A6).

295 The expression pattern of *Nv-CLANK-H* is very similar to *Nv-CLANK-G* during the  
296 middle and late blastoderm stages. It also is initially expressed in an anterior band that  
297 eventually forms a gradient of expression along the AP axis (Fig. 3B1-2). Again,

298 expression is absent at the AP poles and along the dorsal midline. However, while *Nv-*  
299 *CLANK-G* was expressed maternally, *Nv-CLANK-H* has no early expression (data not  
300 shown) and is ubiquitously expressed at very low levels during gastrulation instead of  
301 being localized to CNS precursors (Fig. 3B3).

302 *Nv-CLANK-K* is expressed maternally and ubiquitously at low levels (Fig. 3C1)  
303 before being expressed in an anterior-lateral domain with expression lacking at both the  
304 ventral and dorsal midline and strongest near the anterior pole (Fig. 3C2). This domain  
305 then shifts and expands posteriorly into a more evenly expressed lateral domain, with  
306 inhibition of expression ventrally and at the poles (Fig. 3C3). During gastrulation  
307 expression is lost completely (data not shown).

308 *Nv-CLANK-A* is initially expressed ubiquitously at very low levels before becoming  
309 localized in a broad lateral domain in the early blastoderm (Fig. 4A1-A2). The lateral  
310 domain then shrinks into two discrete bands in the trunk of the embryo, before  
311 expanding first dorsoventrally and then anteroposteriorly into one lateral band (Fig. 4A3-  
312 A5). At times, expression is missing along the ventral and dorsal midlines; however, this  
313 is variable and dynamically changes as the blastoderm undergoes further division and  
314 cellularizes. Expression is lacking in the gastrulating embryo (Fig. 4A6).

315 *Nv-CLANK-E* expression is lacking or at very low levels both before and after the  
316 blastoderm stages (data not shown). Expression is in a broad band from the nearly the  
317 middle of the embryo to just anterior of the posterior pole during the syncytial  
318 blastoderm (Fig. 4B1). During cellularization, this band retracts to a smaller, weaker,  
319 expression domain in the posterior of the embryo (Fig. 4B2-B3).

320 The expression pattern of *Nv-CLANK-I* in the mid to late blastoderm also resembles  
321 that of *Nv-CLANK-G* and *-H*. Again, there is a lateral expression domain with expression  
322 missing from the two poles and the dorsal midline (Fig. 4C1); however, the dynamics of  
323 this transcript differ. Instead of expression first appearing in the anterior region and then  
324 appearing progressively towards the posterior pole, *Nv-CLANK-I* is initially expressed in  
325 this broad domain, spanning the trunk of the embryo, having slightly higher expression  
326 in the anterior and posterior regions. During gastrulation, the anterior expression is lost  
327 until there is just a posterior expression band (Fig. 4C2) and then a posterior spot (Fig.  
328 4C3). *Nv-CLANK-I* is not expressed maternally or in the early blastoderm. (data not  
329 shown).

### 330 **Dorsally expressed CLANKs**

331 Three of the fifteen transcripts are expressed dorsally during embryogenesis. *Nv-*  
332 *CLANK-N* and *-O* both lack maternal expression and are first expressed in the syncytial  
333 blastoderm. *Nv-CLANK-N* is expressed strongly at the anterior and posterior poles and  
334 appears to have weak and variable expression along the dorsal midline (Fig. 5A1-A3).  
335 *Nv-CLANK-O* is expressed evenly along the dorsal midline from pole to pole, stably  
336 expressed throughout syncytial divisions and cellularization (Fig. 5B1-B2). While *Nv-*  
337 *CLANK-N* lacks expression during gastrulation, *Nv-CLANK-O* is expressed dorsally,  
338 surrounding the extraembryonic material (Fig. 5B3).

339 *Nv-CLANK-F* is initially expressed at a low ubiquitous level (Fig. 5C1) before gaining  
340 expression at the anterior and posterior poles (Fig. 5C2). Expression then expands  
341 along the dorsal midline, anterior to posteriorly, ultimately connecting the two poles (Fig.  
342 5C2-C4). In addition, there is dynamic ventral expansion that varies from embryo to

343 embryo and from stage to stage. In some cases, the dorsal stripe expands past the  
344 anterior pole, onto the ventral half of the embryo, creating an anterior cap (Fig. 5C4).  
345 This expansion is accompanied by a perpendicular band, encircling the posterior end of  
346 the embryo's trunk (Fig. 5C5). In other cases, the expansion does not cross into the  
347 ventral half, but still expands to broad domains at the two poles, while remaining narrow  
348 in the mid-trunk region (Fig. 5C6). As the onset of gastrulation nears, this expansion,  
349 and the initial dorsal stripe, retracts, leaving a strong patch of expression at the anterior  
350 pole, a lighter and smaller domain at the posterior pole, and a weak stripe perpendicular  
351 to the dorsal midline in the anterior-dorsal region of the embryo (Fig. 5C7). While the  
352 anterior patch remains strong at the start of gastrulation, the other two expression  
353 domains weaken quickly (Fig. 5C8). Differential expression is eventually lost during  
354 gastrulation, and the whole embryo exhibits weak, ubiquitous expression (Fig. 5C9).

### 355 **Ventrally expressed CLANK**

356 *Nv-CLANK-M* is the only transcript in this family with ventral expression. It starts as a  
357 narrow stripe in the early blastoderm, much like *Nv-twist* (Fig. 6A1). Also, like *Nv-twi*, it  
358 broadens later in development (Fig. 6A2). However, it never takes on a the typical  
359 "slug" shape of the presumptive mesoderm and begins to disappear as gastrulation  
360 initiates. The pattern of disappearance roughly coincides with regions being covered by  
361 the lateral ectoderm (Fig. 6A3).

### 362 **Ubiquitously and postgastrular expressed CLANK**

363 *Nv-CLANK-L* is strongly expressed both maternally (Fig. 6B1) and zygotically (Fig.  
364 6B2-B3). Prior to gastrulation, expression is ubiquitous with the exception of there being  
365 no detectable expression within the budding pole cells (Fig. 6B2). During gastrulation

366 there is a moderate level of expression throughout the embryo; however, there are  
367 highly elevated levels of expression in the area that will become the head and in regions  
368 just anterior and posterior to the extraembryonic material (Fig. 6B3).

369 **Reduction of CLANK transcripts results in significant increases in embryonic**  
370 **lethality**

371 In order to understand the functional significance of this DV expression of the  
372 CLANKs in *Nasonia*, parental RNA interference (pRNAi), where double stranded RNA is  
373 injected into female pupae and its effects are examined in the embryos she produces  
374 [27], was used to knockdown each of the 11 genes with detectable DV expression  
375 patterns. We first analyzed the gross effects of knockdown on embryonic survival to  
376 hatching first instar larvae. Average embryonic lethality of the 11 knockdowns ranged  
377 from 0.87% to 12.19% of embryos plated (Fig. 7). In all cases the frequency of lethality  
378 was larger than in control-injected pupae (0.65%). The difference in lethality was  
379 statistically significant ( $p < 0.05$ ) for 6 of the 11 transcripts tested (Fig. 7).

380 In the course of these experiments focusing on embryonic development, we  
381 observed that the pupal injections also had significant and severe effects on successful  
382 pupal development for Nv-CLANKs. The effect was particularly strong in *Nv-CLANK-E*,  
383 *-K*, *-L* where a quarter or less of injected pupae completed metamorphosis, compared  
384 the 60% rate for mock injected wasps. (Additional File 7). This suggests that these  
385 transcripts may have additional functions in developmental or physiological processes  
386 of pupation.

387 **CLANK transcripts levels are effectively reduced through pRNAi injections**



388           A major caveat of the pRNAi is that the degree by which a transcript is knocked  
389 down and the rate at which the system is turned over can vary from gene to gene. In  
390 order to test the effectiveness of each designed dsRNA, we quantified the knockdown  
391 using qPCR. Ten out of eleven transcripts were reduced to an expression level less  
392 than half of that of mock-injected embryos. Their average expression ranged from 7% to  
393 34% of wildtype mRNA expression (Additional File 8). *Nv-CLANK-O* was not as  
394 effectively knocked down, but it was still reduced to ~64% of wildtype expression.  
395 Expression levels were monitored up to three days post eclosion, we found large  
396 variability in the behavior of the dsRNAs (Additional File 8). Some transcripts were  
397 immediately reduced, while others required a day to have an observable effect.  
398 Additionally, some transcripts were reduced for a number of days, while others quickly  
399 regained expression (Additional File 8).

400           We were encouraged that, despite the incomplete knockdown observed with  
401 qPCR, we still saw a significant increase in embryonic lethality. We sought to  
402 understand whether this lethality was due to disruptions in patterning in the early  
403 embryonic stages, where these CLANKs are expressed. We chose markers of  
404 dorsoventral patterning output that were strong, well understood, and represented the  
405 embryonic regions most sensitive to patterning disruption. Exactly how the observed  
406 disruptions come about is not known and will be the focus of future research.

407

408           **Reduction of dorsolaterally expressed CLANK transcripts disrupts patterning**  
409           **specifically on the dorsal side**

410 The *Nasonia* ortholog of *zerknüllt* (*Nv-zen*) is a well-established marker of the dorsal  
411 half of the embryo during normal development [13]. This zygotically expressed transcript  
412 is first observed in a broad stripe along the dorsal midline of the early blastoderm (Fig.  
413 8A1, B1). This stripe stretches from the anterior to the posterior pole and is more or less  
414 equal in width and intensity throughout its domain. As the blastoderm continues to  
415 divide the domain narrows (Fig. 8A2, B2), and eventually retracts from the posterior  
416 pole as the blastoderm cellularizes and gastrulation begins (Fig. 8A3, B3). During  
417 gastrulation, *Nv-zen* marks the serosa until it begins to migrate and encompass the  
418 embryo (Fig. 8A4, B4). Because *Nv-zen* is the most consistently strongly expressed and  
419 most well characterized marker on the dorsal side of the embryo, it is an ideal marker to  
420 detect disruptions of patterning in this region of the embryo.

421 When individual laterally or dorsally expressed CLANK transcripts (*Nv-CLANK-A*,  
422 *-E*, *-F*, *-G*, *-H*, *-I*, *-K*, *-N*, *-O*) are knocked down, a number of changes in the expression  
423 of *Nv-zen* are observed (Fig. 8C1-F4, Additional File 9). First, in all transcripts tested  
424 (except *Nv-CLANK-K*) some embryos exhibited reduced levels of *Nv-zen* expression.  
425 When visible, the pattern of expression remained unchanged, however, the intensity of  
426 the stripe was much lower than control embryos that were processed in the same ISH  
427 experiment (Fig. 8D3-4). In other instances, the levels were too low to detect and the  
428 embryos appeared to be blank and absent of any *Nv-zen* expression (Fig. 8D1-2). For  
429 all of the knockdowns except for *Nv-CLANK-A* and *-K*, the increased frequency of  
430 reduced levels of *Nv-zen* expression was statistically significant ( $p < 0.05$ ) (Summarized  
431 in Fig. 9).

432           The second change observed is in the spatial domain of *Nv-zen*. The continuity  
433 of the *Nv-zen* expression domain is interrupted in a small proportion of embryos  
434 resulting from knockdown of *Nv-CLANK-E*, *-F*, *-N*, and *-O*. In mild cases, a small region  
435 adjacent to either the anterior or posterior pole is lacking expression (Fig. 8F1, F4),  
436 while the proximal pole and all distal regions appear unchanged. In more severe cases,  
437 larger regions, up to half the embryo (Fig. 8F2), or multiple regions throughout the  
438 embryo (Fig. 8F3) are lacking *Nv-zen* expression. This “incomplete stripe” phenotype  
439 was never observed in wildtype embryos. *Nv-CLANK-K* exhibited no abnormalities in  
440 *Nv-zen* expression (Summarized in Fig. 9).

441           To determine whether the spatial patterns of expression of the CLANKs are related  
442 to their regions of activity, the ventrally expressed *Nv-CLANK-M* was knocked down  
443 and, as would be expected if its function is restricted to its region of expression, the  
444 reduction of this ventrally expressed gene had no apparent effect on patterning the  
445 dorsal side of the embryo, as all observed embryos appeared phenotypically wildtype,  
446 displaying strong dorsal staining of *Nv-zen* (Summarized in Fig. 9).

447

#### 448 **Reduction of ventrolateral CLANK transcripts disrupts patterning, morphogenetic** 449 **movements, and relative timing of embryonic events**

450           Like *zen*, *twist* (*Nv-twist*) is a well-established marker of embryonic development in  
451 *Nasonia*, but for the ventral region of the embryo [13]. *Nv-twist* is first expressed in a  
452 thin stripe along the entire ventral midline of the early blastoderm (Fig. 10A1-B1). As the  
453 blastoderm undergoes additional divisions the stripe widens (Fig. 10A2-B2) before  
454 retracting at the anterior pole forming a pattern that resembles that of a slug (Fig. 10A3-

455 B3). This slug shape persists through cellularization and into the onset of gastrulation  
456 and marks the presumptive mesoderm specifically. The shape is lost once the  
457 mesoderm begins to internalize at the anterior end of the domain. This internalization  
458 progresses from anterior to posterior (Fig. 10B4) until the entire mesoderm is covered  
459 by neuroectoderm.

460 Ventral and laterally expressed CLANK transcripts (*Nv-CLANK-A*, *-E*, *-G*, *-H*, *-I*, *-*  
461 *K*, *-M*) were knocked down individually, and the expression pattern of *Nv-twi* was  
462 observed and characterized with *in situ* hybridization probes in a similar manner as with  
463 *Nv-zen* (Fig. 10C1-F4, Additional File 10). The reduction of these transcripts leads to a  
464 wide array of phenotypes.

465 The first group of phenotypes occurs in the early blastoderm when *Nv-twi*  
466 expands from a narrow to a wide ventral stripe (Fig. 10A1-B2). The reduction of *Nv-twi*  
467 expression is the first phenotype observed at this time point. Structurally these embryos  
468 appeared normal, and when present, the spatiotemporal domain of *Nv-twi* is  
469 unchanged. The frequency of embryos showing no or lower than normal *Nv-twi*  
470 expression (Fig. 10C1-9D2) appeared to be higher in all of the knockdowns except *Nv-*  
471 *CLANK-M*, was statistically significantly different from control for only for *Nv-CLANK-G*  
472 *and -I* (Fig. 11).

473 The second phenotype observed in the early blastoderm is a delay in the  
474 expansion of *Nv-twi* (Fig. 10F1). The expansion of the *Nv-twi* domain is stereotyped and  
475 occurs between nuclear cycle 10 and 11 [13] (compare Fig. 10A1, 10A2, 10E1). This  
476 delay phenotype is observed at a frequency higher than in wildtype embryos, after

477 knockdown of all of the lateral/ventral CLANK transcripts, but is only significantly higher  
478 for *Nv-CLANK-A*, *-E*, *-G*, *-M*. (Fig. 11).

479 Effects of CLANK knockdown become more frequent, severe, and varied in the  
480 late blastoderm stage, when *Nv-twi* is normally expressed in a ventral "slug" shaped  
481 domain (Fig. 10B3). Again, many embryos exhibit reduction in the expression levels of  
482 *Nv-twi*. Levels are sometimes reduced completely, as seen after knockdown of *Nv-*  
483 *CLANK-A*, *-E*, *-G*, *-I*, and *-K* (significantly increased frequency in all but *-A*, Fig. 12), or  
484 to a much lower level than observed in wildtype embryos (*Nv-CLANK-G*, Fig. 10F2,  
485 significantly increased frequency, Fig. 12).

486 *Nv-CLANK-A*, *-E*, *-G*, *-H*, *-I*, or *-M* knock downs all lead to a disruption in the slug  
487 shaped domain of *Nv-twi*. Normally this pattern has very sharp, straight lateral borders  
488 and a very distinct forking at its anterior end. The sharpness and straightness of the  
489 lateral borders are affected at a low, but consistent, frequency after *Nv-CLANK-A*, *-E*, *-*  
490 *G*, *-H*, *-I*, and *-M* knockdown (Fig. 10D3). In rarer cases, *Nv-twi* domains where the  
491 anterior fork did not resolve are observed (only in *Nv-CLANK-G* and *-M*, Fig. 10F3).  
492 Finally, in some embryos the edges of the *Nv-twi* domain remain unchanged, but within  
493 the domain, large patches of cells lack *Nv-twi* expression (Fig. 10D4). The size and  
494 number of these patches vary from embryo to embryo within and between knock down  
495 conditions.

496 This "patchy" phenotype was observed after knockdown of all seven  
497 ventral/lateral CLANKs, and at a much lower frequency in control embryos. However the  
498 difference in frequency of this phenotype was significantly only in *Nv-CLANK-M*

499 knockdowns relative to control (Fig. 12). The “messy” border and missing anterior fork  
500 phenotypes were never observed in wildtype embryos (Fig. 12).

501       The last time point where we looked for disruption is during gastrulation. Again,  
502 embryos were observed that lack positive staining for *Nv-twi* expression as with the two  
503 early stages of development (data not shown); however, this also occurred in wildtype  
504 embryos, and only the knockdown of *Nv-CLANK-K* resulted in a frequency of this  
505 phenotype significantly higher than what is expected (Fig. 13).

506       More interestingly, some knockdowns disrupted the morphogenetic movements  
507 of gastrulation. Normally mesoderm internalization proceeds from anterior to posterior in  
508 *Nasonia* [13] (Fig. 10B4). In rare instances, the mesoderm was observed internalizing  
509 posteriorly to anteriorly (Fig. 10F4) or in a random, disorganized manner (Additional file  
510 10D, Q, Y, Z, EE) when *Nv-CLANK-A*, *-G*, *-K*, or *-M* are knocked down. While never  
511 observed in control embryos (or in the myriad normal embryos observed in other  
512 experiments), this phenotype occurred at the lowest frequency of all that have been  
513 described, and in no condition is the frequency statistically significant (Fig. 13).

514       To again test whether the spatial expression of the CLANKs is correlated with the  
515 location of their phenotypic effects, knockdown embryos from *CLANKs* expressed on  
516 the dorsal half of the embryo (*Nv-CLANK-F*, *-N*, *-O*) were also examined for changes in  
517 *Nv-twi* expression. As expected, the loss (or reduction) of these dorsal transcripts had  
518 no effect on patterning of the ventral side of the embryo. All observed embryos  
519 appeared phenotypically wildtype, displaying strong *Nv-twi* staining (*Nv-CLANK-F*: Fig.  
520 11-13 *Nv-CLANK-N*, *-O*: data not shown).

521 In summary, all of the 11 tested genes showed an increase in embryonic lethality  
522 compared to control. We could then show that markers of DV cell fates are disrupted  
523 spatially (for both *Nv-twi* and *Nv-zen*) and temporally (*Nv-twi* expansion) by knockdown  
524 of different CLANKs. This shows that these novel components of the DV GRN are  
525 functionally integrated and are important in producing a stable and reproducible  
526 patterning output.

527 The above results led us to wonder how long these genes have been a part of DV  
528 patterning in the wasp lineage to *Nasonia*. Are all of these genes unique recent  
529 additions to *Nasonia* DV GRN, or do some of them have a longer history in the wasp  
530 lineage?

### 531 **Discovery of CLANKs in the wasp *Melittobia digitata***

532 The second approach to understand the developmental and evolutionary  
533 significance of this gain of DV expression in *Nasonia* was to examine the function and  
534 expression of CLANKs in other species. This will help to understand how these genes  
535 have been functionally integrated into developmental processes.

536 As we described above, it appears that CLANKs are an ancestral and unique  
537 feature of the Superfamily Chalcidoidea. We have chosen to develop *Melittobia digitata*,  
538 a representative of the Family Eulophidae (separated from *Nasonia* by about 90 million  
539 years of independent evolution [28]), as a comparative model. *Melittobia* is attractive  
540 because it is easily reared in the lab on the same hosts as *Nasonia*, its mode of  
541 embryogenesis is rather similar to *Nasonia*, allowing for more straightforward  
542 comparisons of expression patterns, and it adds an important phylogenetic sampling

543 point in understanding the evolution of development within the megadiverse

544 Chalcidoidea.

545 We sequenced and assembled an embryonic transcriptome from *Melittobia*, and  
546 then searched for potential orthologs of *Nasonia* CLANKs within this transcriptome  
547 using local BLAST [29]. The sequences of the *potential Melittobia* CLANK homologs are  
548 presented in Additional File 5, and were used to generate antisense probes to assess  
549 expression patterns (Fig. 14) and in phylogenetic analysis to assess their relationships  
550 among themselves and with *Nasonia* CLANKs (Fig. 15).

### 551 **Characterization of *Melittobia* CLANK expression**

552 Since there was only weak evidence for direct orthology of *Melittobia* sequences  
553 to the *Nasonia* DV CLANKs, we considered all of the *Melittobia* genes we found to be  
554 potential homologs and assessed their expression. Ten of the seventeen Md-CLANKs  
555 (*Md-CLANK-A, -B, -D, -H, -I, -I2, -J, -K, -L, -N*) we identified as potential homologs of  
556 the DV Nv-CLANKS were not expressed differentially along the DV axis (Additional File  
557 11).

558 In contrast, *Md-CLANK-C* again has dynamic expression in early and gastrulating  
559 embryos (Fig. 14A1-A6). It is absent in pre-blastoderm embryos (Fig. 14A1), then is  
560 initially expressed in three bands along the AP axis of the embryo (Fig. 14A2). The  
561 strongest and most complete is near the posterior pole. Expression increases in  
562 strength and size forming a lateral domain that almost encapsulates the whole embryo.  
563 Expression is lacking at the two poles, along the dorsal midline, and along most of the  
564 ventral midline (Fig. 14A3-A3'). This lateral domain then retracts into two discrete bands  
565 of expression (Fig. 14A4-A4'). The anterior most bands then disappears, leaving just



566 one posterior band (Fig. 14A5). Throughout this retraction the lack of staining at the  
567 dorsal midline and poles persists, however, there is staining at the ventral midline in the  
568 two bands (compare Fig. 14A3-A4'). During gastrulation this posterior band of  
569 expression slowly fades until expression is lacking throughout the embryo (Fig. 14A6).  
570 This pattern is quite similar to previous patterns seen in *Nv-CLANK-G* and *-H*. These  
571 genes are in a phylogenetic cluster of *Nasonia* CLANKs that is sister to a cluster of  
572 exclusively *Melittobia* CLANKs that contains *Md-CLANK-C* (Fig. 15).

573 *Md-CLANK-E* and *-E2* also have low levels of ubiquitous expression in early  
574 embryos and no expression during gastrulation (Fig. 14B1, B4, C1, C4). However, in  
575 blastoderm embryos, both are expressed in a stripe along the dorsal midline. The stripe  
576 is dynamic in expression levels and size along the entire AP axis for both *CLANKs*.  
577 Expression appears to originate at the anterior pole and fill in in a discontinuous manner  
578 until the entire dorsal midline is exhibits expression (Fig. 14B2, B3, C2, C3).  
579 Satisfyingly, these two genes cluster phylogenetically with *Nv-CLANK-O* (Fig. 15), which  
580 is expressed in an almost identical narrow dorsal stripe (Fig. 5B1-B2). This strongly  
581 indicates that the common ancestor of these genes was expressed dorsally and that  
582 this pattern has persisted for 90 million years.

583 Expression of *Md-CLANK-F* and *-F2* is dynamic during blastoderm stages of  
584 development. Early pre-blastoderm and blastoderm-staged embryos have light  
585 ubiquitous expression (Fig. 14D1, E1). Expression is then increased in the yolk of the  
586 syncytial blastoderm (Fig. 14D2, E2), reduced to low levels throughout, and then  
587 localized in a small patch of the dorso-posterior of the embryo (Fig. 14D3,E3) before  
588 quickly being lost again in cellularized blastoderm stage and gastrulating embryos (Fig.

589 14D4,E4). This pattern has no clear counterpart in the *Nasonia* genes we have  
590 examined.

591 In early blastoderm embryos, *Md-CLANK-G* expression appears to be weak and  
592 ubiquitous, with slightly higher expression on the ventral half of the embryo (Fig. 14F1).  
593 Expression increases in intensity forming a stripe along the ventral midline, widest in the  
594 anterior third of the embryo and narrowing in the posterior third (Fig. 14F2-F3). At the  
595 onset of gastrulation, expression is strongest and resembles the characteristic slug  
596 shaped domain of *Nv-twist*, before staining is lost completely (Fig. 14F4). This pattern  
597 does not develop similarly to the ventrally expressed *Nv-CLANK-M* (Fig. 6A1-A3), and  
598 we do not consider it homologous.

599 The phylogenetic analysis revealed that there has likely been large-scale  
600 duplication and divergence (and/or gene conversion) in both wasp lineages (Fig. 15).  
601 Most of the *Nasonia* DV CLANKs cluster in two distinct clades on either side of the  
602 basal split of this protein tree. Similarly, most of the *Melittobia* proteins cluster together,  
603 or with the "off-target" *Nasonia* CLANKs that are not involved in DV patterning (Fig. 15).  
604 There are only a handful of cases that indicate clear orthology between a *Nasonia* DV  
605 CLANK and a *Melittobia* CLANK. *Nv-CLANK-O* clusters strongly with *Md-CLANK-E1*  
606 *and* -E2, while *Nv-CLANK-K* clusters with *Md-CLANK-M* and -D. For the others, more  
607 complex evolutionary histories, involving ancestral genes that duplicated and diverged  
608 multiple times in both lineages after their separation must be considered. Thus, we  
609 propose that *Nv-CLANK-G*, -A, -H, -L, and -C derived the same common ancestral gene  
610 as *Md-CLANK-B*, -C, -G, -I1, -I2, and -K. On the other hand, it is unclear how to relate  
611 *Nv-CLANK-F*, -N, -M, -D, -I, and -J to *Melittobia* counterparts.

612           Horizontally transferred and duplicating genes have been shown to be subject to  
613 complex processes of molecular evolution that make defining ancestry of genes  
614 particularly difficult [30], which might explain the difficulty in defining orthology in these  
615 relatively closely related species. In addition, potentially missing orthologs may have  
616 been misassembled in our transcriptome, and thus not picked up by BLAST analysis.  
617 However, the genes we now have in hand are already quite informative as to the  
618 functional evolution of this gene family.

619

## 620 **Discussion**

621           In this paper we have shown that a group of genes that came about from multiple  
622 rounds of gene duplication and divergence events, potentially following one or more  
623 HGT events, are stably and functionally integrated into the embryonic DV patterning  
624 GRN of the wasp *Nasonia*. Furthermore, we provide evidence that some of the  
625 functionally integrated genes have been participating in developmental processes for a  
626 long period, extending back at least 90 million years to the common ancestor of *M.*  
627 *digitata* and *N. vitripennis*. These results raise myriad questions about the origin and  
628 fate of horizontally transferred genes, why they are sometimes maintained, and how  
629 GRNs change in the course of incorporating these invading genes.

## 630 **Incorporation, duplication, and diversification of DV CLANKs**

631           Ankyrin-repeat motifs (ANK) are important for protein-protein interactions and are  
632 commonly found in proteins across many species [23, 31]. Sequencing of the *Nasonia*  
633 genome uncovered that it contains the largest number of genes coding for ANK proteins  
634 of any insect [17]. Among this large number of ANK domain containing are orthologs to

635 genes that are conserved features of insect genomes. However, the vast majority  
636 (~170) are orphan genes without clear orthologs in other insects that we have termed  
637 CLANKs in this manuscript. A clue to the microbial origin of the CLANKs was the  
638 discovery of PRANC domains at the C-termini of some of the proteins. The PRANC  
639 domain is found in *Wolbachia*, its bacteriophage, poxviruses and various other bacteria,  
640 and its presence strongly indicated HGT from *Wolbachia* into the genome of an  
641 ancestor of *Nasonia*. Our results using PSI-BLAST to identify cryptic similarity of the C-  
642 termini of CLANKS that do not have annotated PRANC domains to C-termini of  
643 *Wolbachia* PRANC and ankyrin domain containing proteins further bolsters this case.

644 Our observations indicate that the large number of CLANKs in *Nasonia* is the  
645 result mostly of duplication and divergence of genes present in the most recent common  
646 ancestor of the Chalcidoidea, rather than repeated HGTs within the *Nasonia* lineage  
647 after the split among the families. This is based on our observation that the proteins are  
648 highly diverged from each other and from any presumed ancestor found in *Wolbachia*.  
649 In addition, the presence of introns in almost all of the sequences, their clear integration  
650 into the transcriptional regulation milieu of the *Nasonia*, and their dispersal throughout  
651 the genome strongly indicate that at least the 15 genes we detected as DV regulated  
652 have a long history in wasp genomes, and likely have arisen from duplication and  
653 divergence processes.

654 Apparently more recent HGT events may give clues about the origin and  
655 evolution of the CLANKs. For example, in the ant *Pseudomyrmex gracilis* [32], and the  
656 bee *Ceratina* [33] we find dozens of Ankyrin domain containing genes that cluster  
657 together in phylogenetic analyses, and also cluster tightly with *Wolbachia* in these same

658 analyses (Additional figures 3 and 4). We cannot exclude that multiple (or no) HGT  
659 events occurred in the lineage leading to *Nasonia* to give the full complement of CLANK  
660 genes in this wasp, and analyses to determine such facts should be an area of  
661 considerable effort in the future.

### 662 **Why were the ancestors of the *Nasonia* DV CLANKs maintained?**

663         The chances of a gene horizontally transferred from a prokaryote to a eukaryote  
664 to be maintained in a genome is likely to be very low, since not only must it gain the  
665 ability to be activated and processed by the eukaryotic transcriptional machinery, but it  
666 should also quickly gain a function in its new milieu. If these conditions are not met  
667 quickly, random mutations will accumulate and without selection, will eventually destroy  
668 protein-coding capacity of the transferred sequence (this is true whether a new gene  
669 arises by duplication, HGT, or de novo [34-38]).

670         Since ankyrin domains are protein binding domains [31, 39, 40] and direct  
671 protein-protein interaction is thought to be an important pre-cursor for proteins to gain  
672 new function [41, 42], ankyrin domain encoding genes like the CLANKs may be  
673 predisposed to gain function in new environments. Furthermore, assuming the ancestral  
674 CLANK possessed a PRANC domain, it could have a ready-made interaction partner in  
675 the form of the Nf- $\kappa$ B homolog Dorsal, which has conserved roles in innate immunity  
676 and embryonic patterning throughout insects [43].

### 677 **Why were CLANKS integrated into DV patterning?**

678         One of the most surprising results of our previous analysis of DV patterning  
679 genes in *Nasonia* was the discovery of so many CLANKs with distinct and unique  
680 expression patterns. Their potential as important regulators of the Toll/Dorsal pathway

681 was quite exciting, especially as there are still major open questions about how the  
682 Toll/Dorsal pathway interacts with BMP signaling to pattern the *Nasonia* embryo [14]. In  
683 Poxviruses, PRANC domain containing genes are known to inhibit the activation of the  
684 NF- $\kappa$ B pathway, hijacking the innate immune system within their hosts [44]. Additionally,  
685 the PRANC domain has been described as being very similar to F-box domains [45], a  
686 domain that is known to induce ubiquitination of I $\kappa$ B, its degradation, and the activation  
687 of NF $\kappa$ B [46]. These associations with NF $\kappa$ B/I $\kappa$ B are very interesting because while  
688 these proteins function as innate immune responses in most mammals, they have been  
689 co-opted to have a function in DV patterning of the embryo of higher insects  
690 (Dorsal/Cactus), including *Nasonia*. Therefore, it is possible that these CLANKs were  
691 incorporated into the DV pathway because they already had previously established  
692 interaction domains with proteins within the pathway (Dorsal/Cactus).

693 That being said, we have made preliminary observations that indicate that  
694 integration of CLANKs is pervasive throughout *Nasonia* development. First, our result  
695 reported here, that some CLANK pRNAi knockdowns lead to maternal lethality indicates  
696 that some of the DV CLANKs have additional roles in adult organisms. In addition,  
697 many of our DV CLANKs are clearly also regulated along the anterior-posterior axis,  
698 which might indicate that additional CLANKs might also play important roles in the  
699 zygotic GRN patterning this axis. Finally, we have identified additional CLANKs  
700 showing maternal mRNA localization to both the anterior and posterior poles of the  
701 oocyte/early embryo, indicating roles in establishing AP polarity and specifying germ  
702 cells, and CLANKs that are specifically upregulated in either male or female embryos,  
703 indicating a role in sex determination (JAL, personal observations). Further functional

704 approaches will be undertaken to assess functional integration of CLANKs into these,  
705 and additional GRNs.

### 706 **What are the molecular roles of DV CLANKs?**

707 While we propose that interaction with Toll/Dorsal signaling may have been  
708 important in the initial integration and stabilization of the CLANKS into the ancestral  
709 Chalcidoidean genome, , it is not clear that this interaction has been maintained for the  
710 modern *Nasonia* CLANKs. The "incomplete stripe" of *Nv-zen* seen after knockdown of  
711 *Nv-CLANK-E*, *-F*, *-N* and *-O* is reminiscent of weak knockdowns of BMP components in  
712 *Nasonia* ([14], JAL personal observation), whereas knockdown of Toll has no effect on  
713 *Nv-zen*. In addition, the strong reduction of intensity of *Nv-zen* could be a disruption of  
714 the BMP signaling, or transcription of target genes downstream of this pathway.

715 The results where the expansion of the *Nv-twist* domain is delayed could be  
716 ascribed to a disruption of Toll signaling. However, our previous work indicated Toll  
717 signaling specifies the initial narrow stripe, while the expansion is mediated by zygotic  
718 factors. Similarly, the later disrupted border is likely caused by disruption of interactions  
719 of zygotic DV patterning genes, rather than Dorsal itself.

720 At some level, it is not surprising that the CLANKs we find today have not  
721 maintained their hypothetical ancestral interaction partners, given the strong divergence  
722 of these genes from each other at the amino acid level, and their 150 million years of  
723 evolution. Understanding the molecular interactions that mediate the function of the  
724 CLANKs will be a high priority in the coming years.

725

726 **When were developmental roles for CLANKs fixed in Chalcidoidea, and how**  
727 **common is recruitment of these genes for developmental processes?**

728 Our curiosity about the evolutionary history of the functional integration of  
729 CLANKs into the *Nasonia* DV patterning network led us to establish the wasp *Melittobia*  
730 as a satellite model organism. Our results indicate on one hand that there is evidence  
731 that CLANKs have been integrated into the DV patterning GRN of some wasps for at  
732 least 90 million years (since the divergence of the Pteromalid and Eulophid Families)  
733 [28], based on the similarity of expression of two sets of CLANK homologs. On the other  
734 hand, we also revealed lineage specific expression patterns for genes in both species,  
735 indicating that functional integration of CLANKs is an ongoing process. Sampling wasps  
736 in other Families in the Chalcidoidea will be necessary to pinpoint the origin of functional  
737 integration of DV CLANKs, and to provide directionality to the changes (i.e., are some  
738 functional CLANKs being lost in some lineages, or is the pattern more due to  
739 independent gains?). It is likely that an unbiased approach to identify DV regulated  
740 genes in *Melittobia* similar to the one we took in *Nasonia* [15], and broad application of  
741 this approach in a defined phylogenetic entity would allow for a high resolution  
742 characterization of the evolutionary history of this gene family.

743 **Conclusion**

744 Our knockdowns of DV CLANKs showed that these genes significantly  
745 participate in ensuring successful embryogenesis and the formation of viable larvae.  
746 Further we showed that a potential role of these genes is to ensure proper  
747 establishment of cell fates along the DV axis. However, in neither the patterning nor the  
748 viability roles do the CLANKs appear to be absolutely essential. Rather, we propose



749 that CLANKs act to constrain fluctuations in early development, and that their loss can  
750 lead to variable fluctuations in patterning which in only rare cases lead to lethality. The  
751 source of the fluctuations could be environmental, genetic, or a combination of the two  
752 [6, 47, 48]. Our results show that even a very modest contribution to stability of  
753 development may lead novel GRN components to be maintained over significant  
754 evolutionary time periods. Thus, our results can be extrapolated to any potential novel  
755 components of GRNs, whether they originate from HGT, de novo genes, and co-option  
756 of existing genes into a new network.

## 757 **Methods**

### 758 **BLASTs and sequence characterization**

759 Our starting sequences were from the *Nasonia* annotation 2.0 [49]. Their NCBI  
760 counterparts were found by BLAST against the nt database [50]. These results provided  
761 the corresponding NCBI Reference Sequence Accession information for the *Nasonia*  
762 2.0 annotations, which was used for downstream analyses of protein function.

763 Other similarity searches used blastp and searched the non-redundant protein  
764 database and default parameters, except cases where searches were limited to a single  
765 species.

766

### 767 **Protein sequence alignment, phylogeny, and conserved domain analysis**

768 Protein sequences corresponding to these fifteen transcripts were then submitted  
769 to search for conservation at the amino acid level and to rendered a phylogenetic tree  
770 using “One Click Robust Phylogenetic Analysis” (<http://phylogeny.lirmm.fr/>) [25]. “One  
771 Click” parameters were as followed: Data & Settings (Gblocks not used), MUSCLE  
772 Alignment (-SeqType Protein), PhyML Phylogeny (Substitution model: WAG), TreeDyn  
773 Tree Rendering (Reroot using mid-point rooting, Branch annotation: Branch support  
774 values). Finally, in order to gain family, domain and repeat information for each  
775 transcript, we analyzed each protein using the Interpro Protein sequence analysis &  
776 classification software (InterProScan5) (<https://www.ebi.ac.uk/interpro/>) [26].

777 Phylogenetic analysis of the top 100 BLAST hits to each CLANK was performed  
778 at <http://www.trex.uqam.ca/> [51]. Alignments were performed using MUSCLE [52],  
779 alignments were manipulated for correct file type using AliView [53], relationships were  
780 inferred with RAxML [54] and trees were drawn and edited in FigTree:  
781 (<http://tree.bio.ed.ac.uk/software/figtree/>). Default parameters were used.

782 PSI\_BLAST was performed using sequence downstream of annotated ankyrin  
783 domains in *Nasonia* CLANKs. 2 iterations were performed for each gene, except  
784 CLANK-L, which required 4 iterations to find sequences outside of *Nasonia* and  
785 *Trichomalopsis*. Only sequences above threshold were used to seed the next iteration.  
786 All aligning sequences were downloaded as FASTA files. These were aligned all to  
787 each other using MUSCLE implemented at T-rex as above, and the resulting alignments  
788 were used for phylogenetic analysis as described above.

789

#### 790 **RNA interference, screening, and embryo collection**

791 Yellow AsymCx (wild-type, cured of *Wolbachia*) pupa were injected with dsRNA  
792 (~1µg/mL in water) designed against each of the transcripts with significant DV  
793 expression as described in [27]. Injected pupae were allowed to eclose and lay eggs.  
794 Overnight egg lays were collected and plated onto 1% PBS agar plates. Embryos were  
795 aged 24 hours at 28°C and then screened for embryonic lethality. Mock, water-injected  
796 embryos were also collected, plated, and screened as a control. Nearly all water-  
797 injected embryos are predicted to hatch within 24 hours and develop into crawling,  
798 feeding, larva. A small number of embryos will fail to hatch, and instead development  
799 will arrest at the embryonic stage. We define this failure to hatch as embryonic lethality.  
800 If the transcript we knockdown is predicted to be vital for embryonic development, we  
801 predict that a higher percent of injected embryos will exhibit this embryonic lethal  
802 phenotype compared to mock-injected embryos.

803 Average embryonic lethality was calculated and plotted as a bar graph for each  
804 condition. Standard deviation was used to calculate standard error, and T-tests ( $p <$   
805 0.05) were used to test for significance. Box plots were also created to provide  
806 visualization of the distribution of observed lethality within each conditional population.

807 Timed egg lays were also conducted to collect 3-7 hours (at 28°C) embryos from

808 each knockdown condition. This time span corresponds to the developmental stages we  
809 know these transcripts are differentially expressed (the penultimate syncytial division  
810 through the beginning of gastrulation) Embryos were fixed and then processed for in  
811 situ hybridization or qPCR.

812

### 813 **Characterization of RNA localization (*in situ* hybridization)**

814 *in situ* hybridization was performed using standard protocols [13, 15] on 0-24  
815 hour, wildtype, AsymCX embryos in order to characterize normal expression patterns of  
816 each CLANK transcript during embryogenesis (specific details available upon request).  
817 Embryos were imaged at 20X magnification on Zeiss widefield, compound epi-  
818 fluorescent microscope.

819 For knockdown experiments, *in situ* protocols were repeated on the 3-7 hours  
820 (28°C) knockdown embryos and on 3-7 hour mock-injected embryos. Anti-sense probes  
821 were generated from primers specific to *Nv-twi* and *Nv-zen*. Knockdown phenotypes  
822 were described based on their divergence from mock-injected expression of *Nv-twi* and  
823 *Nv-zen*, and their frequency of occurrence was calculated and compared to mock-  
824 injected phenotype frequencies. Raw frequency counts were converted to percentages  
825 (out of 100) and Fisher's Exact Test was used to determine if a given phenotypic  
826 frequency observed in knockdown embryos was significantly different from the  
827 frequency of that phenotype in mock-injected embryos ( $p < 0.05$ ).

828

### 829 **Qualitative Polymerase Chain Reaction (qPCR)**

830 RNA was isolated from 3-7 hours (28°C) embryos using standard TRIzol-based  
831 protocols (Ambion 15596018) and converted into cDNA using the Protoscript First  
832 Strand cDNA synthesis kit (NEB 63001), controlling for total RNA input. Two cDNA  
833 replicates were synthesized per condition. cDNA was synthesized in this manner for  
834 each condition for three consecutive days post eclosure of the injected wasps.

835 To assess knockdown, we performed qPCR on knockdown embryos in parallel  
836 with mock-treated embryos. These were carried out using primers specific to the  
837 transcript of interest while using the housekeeping gene, *rp49*, as a control. 20 $\mu$ L per  
838 well PCR reactions were assembled using the PowerUp SYBR Green Master Mix

839 (Applied Biosystems: A25742)(2X MM, 800nM of each primer, cDNA, RFH2O). We  
840 performed the reactions in triplicate using the following parameters: (50°C for 2', 95°C  
841 for 2', 40 cycles of (95°C for 15 sec, 60°C for 60 sec, plate read, 72°C for 60 sec, plate  
842 read), 95°C for 2', gradient 60°C→95°C (0.2°C for 1 sec).

843 Average  $C_T$  was calculated by combining triplicates from both cDNA replicates  
844 for each condition. Knockdown average  $C_T$ 's were then normalized to mock injected  
845 RP49 levels. Knockdown Delta  $C_T$ 's were calculated and expressed as a relative  
846 expression (percentage of wildtype expression). Relative expression was calculated for  
847 each condition per day (up to three days) and an average relative expression was  
848 calculated over the three-day span. Standard deviation was used to calculate standard  
849 error, and T-test ( $p < 0.05$ ) were used to test for significance.

850

### 851 ***Melittobia* sequences**

852 Total mRNA (1 ug) libraries were created from various developmental time points  
853 (ovaries, pre-, early-, late-blastoderm embryos, male-, female-yellow pupa) of the wasp  
854 *Melittobia digitata* using the NEBNext Ultra Directional RNA Library Prep Kit for Illumina  
855 (NEB #E7420) in conjunction with NEBNext Poly(A) mRNA Magnetic Isolation Module  
856 (NEB #E7490). Libraries were validated and quantified before being pooled and  
857 sequenced on an Illumina HiSeq 2000 sequencer with a 100 bp paired-end protocol.  
858 Sequences were de novo assembled using Trinity on a Galaxy Portal. (Currently in  
859 preparation for publication, specific details available upon request). *Melittobia* RNAseq  
860 data is available in the BioSample database under accession numbers  
861 [SAMN08361226, SAMN08361227, SAMN08361228].

862

### 863 ***Melittobia* ortholog discovery**

864 We used a de novo assembled, unannotated embryonic *Melittobia digitata*  
865 Transcriptome as a database for local tBLASTn (*Nv*-protein → *Md*-mRNA) within the  
866 Geneious program (<https://www.geneious.com/>) [29] to search for orthologs to the

867 *Nasonia* CLANK genes. A reciprocal BLAST was done on the top hits. If the reciprocal  
868 BLAST resulted in the *Nasonia* sequence that was input into the query being returned  
869 as the top hit, the hit was considered a strong ortholog candidate. If it did not correctly  
870 BLAST back to the input sequence, the off-target *Nasonia* protein sequence returned  
871 was collected to be input in to downstream phylogenetic analysis. *Melittobia* transcript  
872 sequences were then translated into amino acid sequences via an online Translate tool  
873 (ExpASy, <https://web.expasy.org/translate/>). Longest ORFs sequences were confirmed  
874 to align with tBLASTn hit sequences, and then were collected for phylogenetic analysis.

875 Input *Nasonia*, off-target *Nasonia*, and all potential *Melittobia* ortholog protein  
876 sequences were then submitted to “One Click Robust Phylogenetic Analysis”  
877 (<http://phylogeny.lirmm.fr/>) [25] and trees were rendered relating each chalcid species  
878 orthologs to the *Nasonia* sequences as described earlier in our methods.

879

### 880 ***Melittobia in situ* hybridization**

881 Embryos collection, processing, and *in situ* protocol were developed and  
882 performed in a manner similar to *Nasonia* protocols with minor modifications. (Currently  
883 in preparation for publication, specific details available upon request).

884

### 885 **List of abbreviations**

886 **ANK:** Ankyrin-repeat motifs

887 **CLANKs:** Chalcidoidea Lineage specific ANKyrin domain encoding genes

888 **DV:** dorsoventral

889 **GRN:** Gene regulatory networks

890 **HGT:** horizontal gene transfer

891 ***htl:*** heartless

892 **ISH:** *in situ* hybridization

893 **PRANC:** Pox proteins Repeats of ANkyrin, C-terminal domain

894 **pRNAi:** parental RNA interference

895 **qPCR:** Quantitative PCR

896 ***sna:*** *snail*

897 ***twi:*** *twist*

898 ***zen:*** *zerknüllt*

899 ***zfh:*** *zinc finger homeodomain*

900 **Declarations**

901 **Ethics approval and consent to participate**

902 Not applicable

903 **Consent for publication**

904 Not applicable

905 **Availability of data and materials**

906 *Melittobia* RNAseq data is available in the BioSample database under accession  
907 numbers [SAMN08361226, SAMN08361227, SAMN08361228], the SRA database  
908 under accession number SRP129036, and the BioProject database under accession  
909 number PRJNA429828.

910

911 **Competing interests**

912 The authors declare that they have no competing interests.

913 **Funding**

914 The authors were supported under NIH Grant # 1R03HD087476, 1R03HD078578 (JAL)  
915 and startup fund from University of Illinois at Chicago.

916 **Authors' contributions**

917 DP provided assistance in experimental design and performed all the experiments. JAL  
918 designed the experiments and supervised students. All authors contributed to writing  
919 the manuscript and approved the final manuscript.

## 920 **Acknowledgements**

921 We would like to like to acknowledge the DNA Services Facility at UIC for assistance in  
922 transcriptome sequencing. We would like to thank Sarah Bordenstein and an  
923 anonymous reviewer for helpful suggestions and discussion on this manuscript.

## 924 **REFERENCES**

- 925 1. Levine, M. and E.H. Davidson, *Gene regulatory networks for development*. Proc  
926 Natl Acad Sci U S A, 2005. **102**(14): p. 4936-42.
- 927 2. Stathopoulos, A. and M. Levine, *Genomic regulatory networks and animal*  
928 *development*. Dev Cell, 2005. **9**(4): p. 449-62.
- 929 3. Moczek, A.P., *Developmental capacitance, genetic accommodation, and*  
930 *adaptive evolution*. Evol Dev, 2007. **9**(3): p. 299-305.
- 931 4. Wilkins, A.S., *Canalization: a molecular genetic perspective*. Bioessays, 1997.  
932 **19**(3): p. 257-62.
- 933 5. Nijhout, H.F., *Control mechanisms of polyphenic development in insects - In*  
934 *polyphenic development, environmental factors alter same aspects of*  
935 *development in an orderly and predictable way*. Bioscience, 1999. **49**(3): p. 181-  
936 192.
- 937 6. von Dassow, G., et al., *The segment polarity network is a robust developmental*  
938 *module*. Nature, 2000. **406**(6792): p. 188-92.
- 939 7. Moczek, A.P., *On the origins of novelty in development and evolution*. Bioessays,  
940 2008. **30**(5): p. 432-47.
- 941 8. Sommer, R.J., et al., *The Pristionchus HOX gene Ppa-lin-39 inhibits programmed*  
942 *cell death to specify the vulva equivalence group and is not required during vulval*  
943 *induction*. Development, 1998. **125**(19): p. 3865-3873.
- 944 9. Abouheif, E. and G.A. Wray, *Evolution of the gene network underlying wing*  
945 *polyphenism in ants*. Science, 2002. **297**(5579): p. 249-252.
- 946 10. Wotton, K.R., et al., *Quantitative System Drift Compensates for Altered Maternal*  
947 *Inputs to the Gap Gene Network of the Scuttle Fly Megaselia abdita*. Elife, 2015.  
948 **4**.
- 949 11. Wiegmann, B.M., et al., *Single-copy nuclear genes resolve the phylogeny of the*  
950 *holometabolous insects*. BMC Biol, 2009. **7**: p. 34.
- 951 12. Davis, G.K. and N.H. Patel, *Short, long, and beyond: molecular and*  
952 *embryological approaches to insect segmentation*. Annu Rev Entomol, 2002. **47**:  
953 p. 669-99.

- 954 13. Buchta, T., et al., *Patterning the dorsal-ventral axis of the wasp Nasonia*  
955 *vitripennis*. Dev Biol, 2013. **381**(1): p. 189-202.
- 956 14. Ozuak, O., et al., *Dorsoventral Polarity of the Nasonia Embryo Primarily Relies*  
957 *on a BMP Gradient Formed without Input from Toll*. Current Biology, 2014.  
958 **24**(20): p. 2393-2398.
- 959 15. Pers, D., et al., *Global analysis of dorsoventral patterning in the wasp Nasonia*  
960 *reveals extensive incorporation of novelty in a regulatory network*. BMC Biology,  
961 2016. **14**.
- 962 16. Bordenstein, S.R. and S.R. Bordenstein, *Eukaryotic association module in phage*  
963 *WO genomes from Wolbachia*. Nature Communications, 2016. **7**.
- 964 17. Werren, J.H., et al., *Functional and evolutionary insights from the genomes of*  
965 *three parasitoid Nasonia species*. Science, 2010. **327**(5963): p. 343-8.
- 966 18. Xiao, J.H., et al., *Obligate mutualism within a host drives the extreme*  
967 *specialization of a fig wasp genome*. Genome Biology, 2013. **14**(12).
- 968 19. Lindsey, A.R.I., et al., *Comparative genomics of the miniature wasp and pest*  
969 *control agent Trichogramma pretiosum*. BMC Biology, 2018. **16**.
- 970 20. Penz, T., M. Horn, and S. Schmitz-Esser, *The genome of the amoeba symbiont*  
971 *"Candidatus Amoebophilus asiaticus" reveals common mechanisms for host cell*  
972 *interaction among amoeba-associated bacteria*. Virulence, 2010. **1**(6): p. 541-  
973 545.
- 974 21. Altschul, S.F., et al., *Gapped BLAST and PSI-BLAST: a new generation of*  
975 *protein database search programs*. Nucleic Acids Res, 1997. **25**(17): p. 3389-  
976 402.
- 977 22. Machado, C.A., et al., *Phylogenetic relationships, historical biogeography and*  
978 *character evolution of fig-pollinating wasps*. Proc Biol Sci, 2001. **268**(1468): p.  
979 685-94.
- 980 23. Jernigan, K.K. and S.R. Bordenstein, *Ankyrin domains across the Tree of Life*.  
981 PeerJ, 2014. **2**.
- 982 24. Sievers, F., et al., *Fast, scalable generation of high-quality protein multiple*  
983 *sequence alignments using Clustal Omega*. Molecular Systems Biology, 2011. **7**.
- 984 25. Dereeper, A., et al., *Phylogeny.fr: robust phylogenetic analysis for the non-*  
985 *specialist*. Nucleic Acids Res, 2008. **36**(Web Server issue): p. W465-9.
- 986 26. Jones, P., et al., *InterProScan 5: genome-scale protein function classification*.  
987 Bioinformatics, 2014. **30**(9): p. 1236-1240.
- 988 27. Lynch, J.A. and C. Desplan, *A method for parental RNA interference in the wasp*  
989 *Nasonia vitripennis*. Nat Protoc, 2006. **1**(1): p. 486-94.
- 990 28. Peters, R.S., et al., *Evolutionary History of the Hymenoptera*. Current Biology,  
991 2017. **27**(7): p. 1013-1018.
- 992 29. Kearse, M., et al., *Geneious Basic: an integrated and extendable desktop*  
993 *software platform for the organization and analysis of sequence data*.  
994 Bioinformatics, 2012. **28**(12): p. 1647-9.
- 995 30. Hao, W. and J.D. Palmer, *HGT turbulence: Confounding phylogenetic influence*  
996 *of duplicative horizontal transfer and differential gene conversion*. Mob Genet  
997 Elements, 2011. **1**(4): p. 256-261.
- 998 31. Mosavi, L.K., et al., *The ankyrin repeat as molecular architecture for protein*  
999 *recognition*. Protein Science, 2004. **13**(6): p. 1435-1448.



- 1000 32. Rubin, B.E.R. and C.S. Moreau, *Comparative genomics reveals convergent rates*  
1001 *of evolution in ant-plant mutualisms*. Nature Communications, 2016. **7**.
- 1002 33. Rehan, S.M., et al., *The Genome and Methylome of a Subsocial Small Carpenter*  
1003 *Bee, Ceratina calcarata*. Genome Biol Evol, 2016. **8**(5): p. 1401-10.
- 1004 34. Chen, S., et al., *Reshaping of global gene expression networks and sex-biased*  
1005 *gene expression by integration of a young gene*. EMBO J, 2012. **31**(12): p. 2798-  
1006 809.
- 1007 35. Zhang, W., et al., *New genes drive the evolution of gene interaction networks in*  
1008 *the human and mouse genomes*. Genome Biol, 2015. **16**: p. 202.
- 1009 36. Lynch, M., et al., *The probability of preservation of a newly arisen gene duplicate*.  
1010 Genetics, 2001. **159**(4): p. 1789-804.
- 1011 37. Lynch, M. and J.S. Conery, *The evolutionary fate and consequences of duplicate*  
1012 *genes*. Science, 2000. **290**(5494): p. 1151-5.
- 1013 38. Assis, R. and D. Bachtrog, *Neofunctionalization of young duplicate genes in*  
1014 *Drosophila*. Proc Natl Acad Sci U S A, 2013. **110**(43): p. 17409-14.
- 1015 39. Sedgwick, S.G. and S.J. Smerdon, *The ankyrin repeat: a diversity of interactions*  
1016 *on a common structural framework*. Trends in Biochemical Sciences, 1999.  
1017 **24**(8): p. 311-316.
- 1018 40. Bork, P., *Hundreds of Ankyrin-Like Repeats in Functionally Diverse Proteins -*  
1019 *Mobile Modules That Cross Phyla Horizontally*. Proteins-Structure Function and  
1020 Genetics, 1993. **17**(4): p. 363-374.
- 1021 41. Lynch, M., *The Evolution of Multimeric Protein Assemblages*. Molecular Biology  
1022 and Evolution, 2012. **29**(5): p. 1353-1366.
- 1023 42. Capra, J.A., K.S. Pollard, and M. Singh, *Novel genes exhibit distinct patterns of*  
1024 *function acquisition and network integration*. Genome Biology, 2010. **11**(12).
- 1025 43. Moussian, B. and S. Roth, *Dorsoventral axis formation in the Drosophila embryo*  
1026 *- Shaping and transducing a morphogen gradient*. Current Biology, 2005. **15**(21):  
1027 p. R887-R899.
- 1028 44. Chang SJ, H.J., Sonnberg S, Chiang CT, Yang MH, Tzou DL, Mercer AA, Chang  
1029 W., *Poxvirus host range protein CP77 contains an F-box-like domain that is*  
1030 *necessary to suppress NF-kappaB activation by tumor necrosis factor alpha but*  
1031 *is independent of its host range function*. J Virol., 2009. **83**: p. 4140-52.
- 1032 45. Mercer, A.A., S.B. Fleming, and N. Ueda, *F-box-like domains are present in most*  
1033 *poxvirus ankyrin repeat proteins*. Virus Genes, 2005. **31**(2): p. 127-133.
- 1034 46. Spencer E., J.J., Chen Z.J., *Signal-induced ubiquitination of Ikb $\alpha$  by the F-box*  
1035 *protein Slimb/ $\beta$ -TrCP*. Genes Dev., 1999. **13**: p. 284-294.
- 1036 47. Kitano, H., *Biological robustness*. Nat Rev Genet, 2004. **5**(11): p. 826-37.
- 1037 48. Gavin-Smyth, J., et al., *A genetic network conferring canalization to a bistable*  
1038 *patterning system in Drosophila*. Curr Biol, 2013. **23**(22): p. 2296-302.
- 1039 49. Rago, A., et al., *OGS2: genome re-annotation of the jewel wasp Nasonia*  
1040 *vitripennis*. BMC Genomics, 2016. **17**.
- 1041 50. Altschul, S.F., et al., *Basic local alignment search tool*. J Mol Biol, 1990. **215**(3):  
1042 p. 403-10.
- 1043 51. Boc, A., A.B. Diallo, and V. Makarenkov, *T-REX: a web server for inferring,*  
1044 *validating and visualizing phylogenetic trees and networks*. Nucleic Acids Res,  
1045 2012. **40**(Web Server issue): p. W573-9.

- 1046 52. Edgar, R.C., *MUSCLE: multiple sequence alignment with high accuracy and high*  
1047 *throughput*. *Nucleic Acids Res*, 2004. **32**(5): p. 1792-7.  
1048 53. Larsson, A., *AliView: a fast and lightweight alignment viewer and editor for large*  
1049 *datasets*. *Bioinformatics*, 2014. **30**(22): p. 3276-3278.  
1050 54. Stamatakis, A., *RAxML-VI-HPC: maximum likelihood-based phylogenetic*  
1051 *analyses with thousands of taxa and mixed models*. *Bioinformatics*, 2006. **22**(21):  
1052 p. 2688-90.  
1053

1054

## 1055 **Figure Legends**

1056 **Fig. 1. PSI-BLAST and phylogenetic analyses support the HGT origin of DV-**  
1057 **regulated ankyrin genes in chalcid wasps (CLANKs), and additional HGTs in**  
1058 **insects. A.** A portion of the phylogenetic tree generated from significant sequences  
1059 using the C-terminus of *Nv-CLANK-C* as a query in PSI-BLAST. DV regulated ankyrin  
1060 genes CLANK-O and -N cluster with ankyrin genes from *Wolbachia*, and other  
1061 representatives of the Chalcidoidea (*Trichogramma*, *Ceratosolen*, and *Copidosoma*). **B.**  
1062 Numerous proteins from the ant *Pseudomyrmex* cluster strongly and consistently with  
1063 other *Wolbachia* ankyrin domain encoding genes. **C.** Screen capture of BLAST result  
1064 illustrating the strong similarity of C-terminal sequence from a protein not annotated as  
1065 having a PRANC domain (*Nv-CLANK-B*).

## 1066 **Fig. 2. Phylogenetic analysis of *Nasonia* DV regulated CLANKs protein family.**

1067 (Left) Phylogenetic tree of CLANK proteins of interest generated using “One Click”  
1068 Phylogeny Analysis (<http://phylogeny.lirmm.fr/>) [25]. Branch length is proportional to the  
1069 number of substitutions per site. Blue text represents proteins containing a PRANC  
1070 domain. (Right) Corresponding mRNA expression domain (D = dorsally, L = laterally, V  
1071 = ventrally, G = no diff. expression until gastrulation, blank = ubiquitous or lack of  
1072 expression), chromosomal location, number of exons (\* = two differentially spliced

1073 transcripts occur, both contain same number of exons), and number of ankyrin repeats  
1074 for each CLANK protein of interest. Colors added to emphasize similar value in each  
1075 column.

1076

1077 **Fig. 3. Laterally expressed CLANKs with dynamic expansion. A1-A6** Expression of  
1078 *Nv-CLANK-G* from pre-blastoderm through gastrulation. **B1-B3** Expression of *Nv-*  
1079 *CLANK-H* from blastoderm to gastrulation. **C1-C3** Expression of *Nv-CLANK-K* from pre-  
1080 blastoderm through late-blastoderm. All embryos are oriented with anterior to the left,  
1081 posterior to the right, dorsal up, and ventral down (except A5, dorsal view).

1082

1083 **Fig. 4. Laterally expressed CLANKs with dynamic retraction. A1-A6** Expression of  
1084 *Nv-CLANK-A* from pre-blastoderm through gastrulation. **B1-B3** Expression of *Nv-*  
1085 *CLANK-E* from mid to late blastoderm. **C1-C3** Expression of *Nv-CLANK-I* from  
1086 blastoderm through gastrulation. All embryos are oriented with anterior to the left,  
1087 posterior to the right, dorsal up, and ventral down.

1088

1089 **Fig. 5. Dorsally expressed CLANKs. A1-A3** Expression of *Nv-CLANK-N* from early to  
1090 late-blastoderm. **B1-B3** Expression of *Nv-CLANK-O* from early-blastoderm through  
1091 gastrulation. **C1-C9** Expression of *Nv-CLANK-F* from pre-blastoderm through  
1092 gastrulation. All embryos are oriented with anterior to the left, posterior to the right,  
1093 dorsal up, and ventral down (except C7-C8, bird's eye dorsal view).

1094

1095 **Fig. 6. Ventral and other CLANK expression patterns. A1-A3** Expression of *Nv-*  
1096 *CLANK-M* from early-blastoderm through gastrulation. **B1-B3** Expression of *Nv-CLANK-*  
1097 *L* from pre-blastoderm through gastrulation. All embryos are oriented with anterior to the  
1098 left, posterior to the right, dorsal up, and ventral down.

1099

1100 **Fig. 7. Distribution of pRNAi induced embryonic lethality for each CLANK of**  
1101 **interest.** Range of embryonic lethality (as a percentage) observed in clutches of  
1102 embryos from pRNAi knockdown females for each CLANK and mock injected embryos.  
1103 Error bars represent minimal and maximum values. Horizontal line represents median  
1104 value. Red box ranges from lower to upper quartile values. t-tests were performed  
1105 comparing each CLANKs lethality to mock injected lethality. Corresponding p values  
1106 listed above graph (n.s. = non-significant).

1107

1108 **Fig. 8. Effects of reducing CLANKs on *Nv-zen* expression. A1-B4** Expression of *Nv-*  
1109 *zen* from early-blastoderm through gastrulation in control embryos. **A1-A4** Control  
1110 embryos stained with DAPI to approximate embryo age. **B1-B4** *In situ* hybridization of  
1111 control embryos probing for *Nv-zen* expression. Embryos (**B1-B4**) correspond to same  
1112 embryos in **A1-A4**. **C1-F4** Altered expression of *Nv-zen* following pRNAi of one CLANK  
1113 transcript (lower left corner) in mid-late blastoderm embryos. **C1-C4, E1-E4** Knockdown  
1114 embryos stained with DAPI to approximate embryo age. **D1-D4, F1-F4** *In situ*  
1115 hybridization of knockdown embryos probing for *Nv-zen* expression (“phenotype”  
1116 observed, lower right). Embryos correspond to same embryos in **C1-C4, E1-E4**. All

1117 embryos are oriented with anterior to the left, posterior to the right, dorsal up, and  
1118 ventral down.

1119

1120 **Fig. 9. Distribution of pRNAi phenotypes affecting *Nv-zen* expression for each**  
1121 **knockdown condition.** Percentage of knockdown embryos observed with wildtype *Nv-*  
1122 *zen* expression, reduced levels of *Nv-zen* expression, an incomplete or partial dorsal  
1123 stripe domain of *Nv-zen*, or lacking *Nv-zen* expression completely. Mock-injected  
1124 embryos were also observed for comparison and to calculate Fisher's Exact Test to  
1125 determine if a significant difference ( $p < 0.05$ ) between the two populations for the given  
1126 phenotype exists ( $p$ -value  $< 0.05$  signified by bar above graph, color corresponds to  
1127 phenotype with significant difference). Schematic representation of each phenotype is  
1128 shown below graph.

1129

1130 **Fig. 10. Effects of reducing CLANKs on *Nv-twi* expression. A1-B4** Wildtype  
1131 expression of *Nv-twi* from early-blastoderm through gastrulation. **A1-A4** Wildtype  
1132 embryos stained with DAPI to approximate embryo age. **B1-B4** *In situ* hybridization of  
1133 wildtype embryos probing for *Nv-twi* expression. Embryos (**B1-B4**) correspond to same  
1134 embryos in **A1-A4**. **C1-F4** Altered expression of *Nv-twi* following pRNAi of one CLANK  
1135 transcript (lower left corner) in early-blastoderm through gastrulating embryos. **C1-C4**,  
1136 **E1-E4** Knockdown embryos stained with DAPI to approximate embryo age. **D1-D4**, **F1-**  
1137 **F4** *in situ* hybridization of knockdown embryos probing for *Nv-twi* expression  
1138 ("phenotype" observed, lower right). Embryos correspond to same embryos in **C1-C4**,

1139 **E1-E4.** Most embryos are oriented with anterior to the left, posterior to the right, dorsal  
1140 up, and ventral down (C4/D4, E2/F2-E4/F4 are bird's eye ventral views).

1141

1142 **Fig. 11. Distribution of pRNAi phenotypes affecting early *Nv-twi* expression for**  
1143 **each knockdown condition.** Percentage of knockdown embryos observed with  
1144 wildtype *Nv-twi* expression, a delay in the expansion of *Nv-twi* from a thin to thick  
1145 ventral stripe, reduced levels of *Nv-twi* expression, or lacking *Nv-twi* expression  
1146 completely. Mock-injected embryos were also observed for comparison and to calculate  
1147 Fisher's Exact Test to determine if a significant difference ( $p < 0.05$ ) between the two  
1148 populations for the given phenotype exists ( $p$ -value  $< 0.05$  signified by bar above graph,  
1149 color corresponds to phenotype with significant difference). Schematic representation of  
1150 each phenotype is shown below graph.

1151

1152 **Fig. 12. Distribution of pRNAi phenotypes effecting mid-late blastoderm *Nv-twi***  
1153 **expression for each knockdown condition.** Percentage of knockdown embryos  
1154 observed with wildtype *Nv-twi* expression, a messy slug domain border of *Nv-twi*,  
1155 missing/disrupted slug fork head expression, patchy slug expression, reduced levels of  
1156 *Nv-twi* expression, or lacking *Nv-twi* expression completely. Mock-injected embryos  
1157 were also observed for comparison and to calculate Fisher's Exact Test to determine if  
1158 a significant difference ( $p < 0.05$ ) between the two populations for the given phenotype  
1159 exists ( $p$ -value  $< 0.05$  signified by bar above graph, color corresponds to phenotype with  
1160 significant difference). Schematic representation of each phenotype is shown below  
1161 graph.

1162

1163 **Fig. 13. Distribution of pRNAi phenotypes effecting late *Nv-twi* expression for**  
1164 **each knockdown condition.** Percentage of knockdown embryos observed with  
1165 wildtype *Nv-twi* expression and mesodermal internalization, improper ingression of the  
1166 mesoderm, or lacking *Nv-twi* expression completely. Mock-injected embryos were also  
1167 observed for comparison and to calculate Fisher's Exact Test to determine if a  
1168 significant difference ( $p < 0.05$ ) between the two populations for the given phenotype  
1169 exists ( $p$ -value  $< 0.05$  signified by bar above graph, color corresponds to phenotype with  
1170 significant difference). Schematic representation of each phenotype is shown below  
1171 graph.

1172 **Fig. 14. *Melittobia* CLANK candidates with significant expression patterns. A1-A6**  
1173 Expression of *Md-CLANK-C* from pre-blastoderm through gastrulation. **A3,A4** are dorsal  
1174 views. **A3',A4'** are ventral views of the same embryo. **B1-B4** Expression of *Md-*  
1175 *CLANK-E1* from pre-blastoderm through gastrulation. **C1-C4** Expression of *Md-CLANK-*  
1176 *E2* from pre-blastoderm through gastrulation. **D1-D4** Expression of *Md-CLANK-F1* from  
1177 pre-blastoderm through gastrulation (**D3** is a bird's eye, dorsal view). **E1-E4** Expression  
1178 of *Md-CLANK-F2* from pre-blastoderm through gastrulation. **F1-F4** Expression of *Md-*  
1179 *CLANK-G* from early blastoderm to the start of gastrulation. **F2-F4** are bird's eye ventral  
1180 views. All embryos are oriented with anterior to the left, posterior to the right, dorsal up,  
1181 and ventral down (unless otherwise noted).

1182

1183 **Fig. 15. Phylogenetic analysis of *Nasonia* and *Melittobia* CLANK protein families.**  
1184 **(Tree)** Phylogenetic tree of CLANK proteins of interest. Blue = *Nasonia* CLANKs. Red =

1185 *Melittobia* CLANK ortholog candidates. Black = *Nasonia* off-target sequences from  
1186 *Melittobia* reciprocal BLASTs. Branch length is proportional to the number of  
1187 substitutions per site [25]. **(Inset Images)** Representative images of *Melittobia* orthologs  
1188 with significant RNA localization and *Nasonia* ortholog with similar pattern. Colored box  
1189 highlights pairing between wasp orthologs (violet, lime, teal, tangerine). Colored lines  
1190 point to orthologs phylogenetic branch on tree (Red = *Melittobia*, Blue = *Nasonia*).

1191

1192

### 1193 **Additional Files**

1194 **Additional File 1. (.xlsx) *D.melanogaster* and *A.mellifera* BLASTp hits for each**  
1195 ***Nasonia* novel ankyrin-repeat containing transcript.** Each of the 15 novel *Nasonia*  
1196 transcripts was entered into a BLASTp query to search for homologous proteins in  
1197 *Drosophila* and *Apis*. The top 100 hits were collected (duplicate sequences were  
1198 removed) for each *Nasonia* transcript (individual sheets within workbook). Each row  
1199 represents a distinct BLASTp hit and contains the hit's description (column A), BLAST  
1200 e-value (column B), and NCBI accession number (column C).

1201

1202 **Additional File 2. (.xlsx) Top *D.melanogaster* and *A.mellifera* BLASTp novel**  
1203 **ankyrin-repeat hits.** All sequences from Additional file 1 were pooled (duplicate  
1204 sequences removed) and entered as a reciprocal BLASTp query to see if they were  
1205 strongly homologous to the *Nasonia* novel ankyrin-repeat containing transcripts. Each  
1206 row represents a distinct BLASTp hit from Additional file 1, and again contains the hit's  
1207 description (column A, Yellow highlights *Apis* sequences. *Drosophila* sequences are left



1208 in white), BLAST e-value (column B), and NCBI accession number (column C) as well  
1209 as the description of the *Nasonia* protein it reciprocal BLASTs back to (column E),  
1210 BLAST e-value (column F), and NCBI accession number (column G).

1211

1212 **Additional File 3. (.docx)** Phylogenetic Analyses of the top 100 blast hits for each of  
1213 the 15 Nv-CLANKs analyzed in this paper. CLANK sequences are in red, and bacterial  
1214 and viral sequences are in green. Clades containing many *Trichomonas ankyrin*  
1215 domain encoding genes have been collapsed.

1216

1217 **Additional File 4. (.pdf)** Phylogenetic analysis of Psi-BLAST of the C-termini of  
1218 **Nv-CLANKs**. CLANK sequences are in red, and bacterial and viral sequences are in  
1219 green. Large clades containing sequences exclusively from a single species have been  
1220 collapsed. See label for panel number and CLANK used as query to generate the tree.

1221

1222 **Additional File 5. (.xlsx)** Relationships between our sequence nomenclature and  
1223 **gene identification numbers in different annotations. Sheet 1. Reference**  
1224 **sequences and names corresponding to each novel ankyrin-repeat containing**  
1225 ***Nasonia* transcripts.** “Working Code”, “Transcript” number from annotation 2.0 of the  
1226 *N. vitripennis* genome, and corresponding “Gene Symbol”, “NCBI Reference Sequence”  
1227 (mRNA), and “NCBI Reference Sequence” (protein) for each transcript of interest.

1228 Alternatively, spliced transcripts and proteins are listed as a second row for a given

1229 “Transcript.” **Sheet 2. CLANK ortholog candidate sequences in *Melittobia*.** Column

1230 A: Working code used throughout paper to identify sequences. Column B: *Melittobia*

1231 CLANK sequence accession numbers from de novo embryonic transcriptome (in prep).

1232 **Sheet 3. *Nasonia* off-target hits from *Melittobia* CLANK ortholog BLAST.** Column

1233 A: Working code used throughout paper to identify sequences. Column B: *Nasonia*

1234 sequence accession numbers from annotation 2.0 of the *N. vitripennis* genome. Column

1235 C: *Nasonia* NCBI Reference Sequences. Column D: *Nasonia* NCBI Reference

1236 Sequences predicted gene name. **Sheet 4. *Melittobia* primer sequences for *in situ***

1237 **hybridization probes.** Column A: Primer name. Column B: Primer sequence. Primers

1238 were designed using Primer3 v.0.4.0 (<http://primer3.ut.ee>) and synthesized by

1239 Integrated DNA Technologies (IDT, [www.idtdna.com/Site/Order/oligoentry](http://www.idtdna.com/Site/Order/oligoentry)).

1240

1241 **Additional File 6. (.tiff) CLANKs lacking differential expression patterns. A1-D3**

1242 Expression of *Nv-CLANK-B*, *-C*, *-D*, *-J* from pre-blastoderm through gastrulation. All

1243 embryos are oriented with anterior to the left, posterior to the right, dorsal up, and

1244 ventral down.

1245

1246 **Additional file 7. (.tiff) Distribution of pRNAi survival rate for each CLANK of**

1247 **interest.** Range of pupal survival and eclosure (as a percentage) observed in pRNAi

1248 knockdown females for each CLANK and mock injection. Error bars represent minimal

1249 and maximum values. Horizontal line represents median value. Red box ranges from

1250 lower to upper quartile values.

1251

1252 **Additional File 8. (.tiff) Relative embryonic expression of CLANK transcripts over**

1253 **time following pRNAi.** cDNA was generated from aged (3-7 h, 28°C) embryos,

1254 collected from pRNAi injected females for up to three days post eclosure. mRNA  
1255 expression levels of the knockdown transcript were monitored via qPCR. Relative  
1256 expression compared to mock injected embryos (as a percentage out of 100) was  
1257 calculated and plotted after reactions were normalized via *Nv-rp49* expression.

1258 Expression values are an average of biological and technical replicates.

1259

1260 **Additional File 9. (.tiff) Effects of reducing CLANKs on *Nv-zen* expression. A-U'**

1261 Altered expression of *Nv-zen* following pRNAi of a *CLANK* of interest in mid-late  
1262 blastoderm embryos. **A-U** Knockdown embryos stained with DAPI to approximate  
1263 embryo age. **A'-U'** *In situ* hybridization of knockdown embryos probing for *Nv-zen*  
1264 expression. Embryos correspond to same embryos in **A-U**. All embryos are oriented  
1265 with anterior to the left, posterior to the right, dorsal up, and ventral down. **A-B'** *Nv-*  
1266 *CLANK-A* pRNAi embryos. **C-D'** *Nv-CLANK-G* pRNAi embryos. **E-G'** *Nv-CLANK-E*  
1267 pRNAi embryos. **H-K'** *Nv-CLANK-F* pRNAi embryos. **L-M'** *Nv-CLANK-H* pRNAi  
1268 embryos. **N-O'** *Nv-CLANK-I* pRNAi embryos. **P-R'** *Nv-CLANK-N* pRNAi embryos. **S-U'**  
1269 *Nv-CLANK-O* pRNAi embryos. Descriptive term of phenotype observed in bottom right  
1270 corner of *in situ* images.

1271

1272 **Additional File 10. (.tiff) Effects of reducing CLANKs on *Nv-twi* expression. A-EE'**

1273 Altered expression of *Nv-twi* following pRNAi of a *CLANK* of interest in mid blastoderm  
1274 to gastrulating embryos. **A-EE** Knockdown embryos stained with DAPI to approximate  
1275 embryo age. **A'-EE'** *In situ* hybridization of knockdown embryos probing for *Nv-twi*  
1276 expression. Embryos correspond to same embryos in **A-EE**. All embryos are oriented

1277 with anterior to the left, posterior to the right, dorsal up, and ventral down (unless  
1278 otherwise noted). **A-D'** *Nv-CLANK-A* pRNAi embryos (C/C', D/D' ventral views). **E-F'**  
1279 *Nv-CLANK-E* pRNAi embryos. **G-I'** *Nv-CLANK-H* pRNAi embryos (H/H' ventral views).  
1280 **J-Q'** *Nv-CLANK-G* pRNAi embryos (K-N' ventral views). **R-U'** *Nv-CLANK-I* pRNAi  
1281 embryos (S/S', U/U' ventral views). **V-Z'** *Nv-CLANK-K* pRNAi embryos. **AA-EE'** *Nv-*  
1282 *CLANK-M* pRNAi embryos (AA-EE' ventral views). Descriptive term of phenotype  
1283 observed in bottom right corner of *in situ* images.

1284

1285 **Additional File 11. (.tiff) *Melittobia* CLANK candidates lacking differential**  
1286 **expression patterns. A1-J3** Expression of *Md-CLANK-A, -B, -D, -H, -I1, -I2, -J, -K, -L,*  
1287 *and -N* from pre-blastoderm through gastrulation. All embryos are oriented with anterior  
1288 to the left, posterior to the right, dorsal up, and ventral down (except B3, bird's eye  
1289 dorsal view).

A

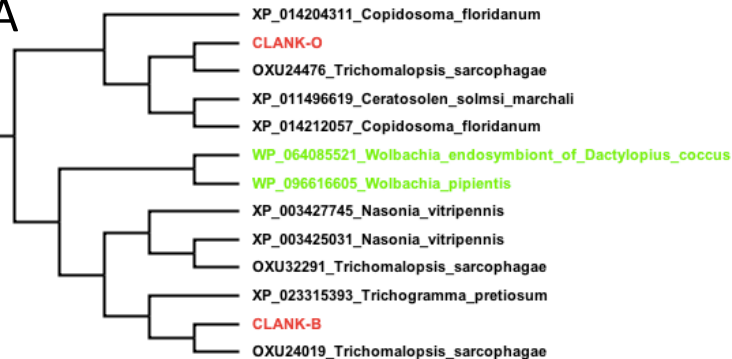

B

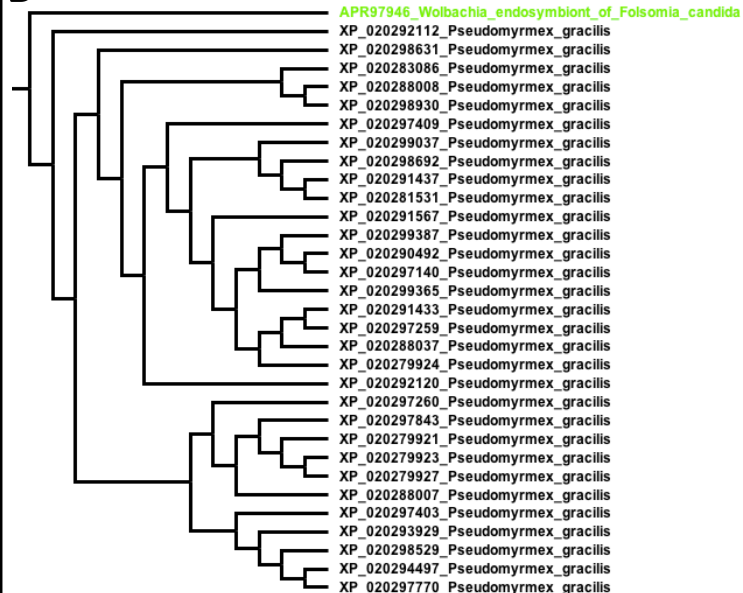

C

MULTISPECIES: PRANC domain-containing protein [Wolbachia]

Sequence ID: [WP\\_010405507.1](#) Length: 946 Number of Matches: 1

[See 4 more title\(s\)](#)

Range 1: 770 to 920 [GenPept](#) [Graphics](#)

[Next Match](#) [Previous](#)

| Score         | Expect                                                       | Method                   | Identities  | Positives   | Gaps      |
|---------------|--------------------------------------------------------------|--------------------------|-------------|-------------|-----------|
| 137 bits(346) | 5e-34                                                        | Composition-based stats. | 34/152(22%) | 64/152(42%) | 3/152(1%) |
| Query 25      | LVRHMLMTVROQFIGVKNVDAILSRPEYFTIFQLSLREIHLMQTKIGNSNVFYDDLTT   | 84                       |             |             |           |
|               | L RH+ M ++ KN+ ++ E EI M+ KI N N+ +Y +L                      |                          |             |             |           |
| Sbjct 770     | LKRHIVKMTANLYVSEKNLLSMSISGIEISGFQDECEEEIARMKSEKINPNISFYGILA  | 829                      |             |             |           |
| Query 85      | GKGRQLVKYAQNVDVAETMEAQYRLAYCHYYQMLIVNYTTGKTRLNLIROASIKLVEL   | 144                      |             |             |           |
|               | L Y ++ ++ ++ Y+ + Y M + ++ G R L+ Q + L                      |                          |             |             |           |
| Sbjct 830     | KGTSSLAIYMRDENIVQVLKSDDYKTKFPIYASH-IESHFRKGMERKELLEQGNKIFHPL | 888                      |             |             |           |
| Query 145     | APV--KLPTEIATYICEHLSNKNLLNLEKTKL                             | 174                      |             |             |           |
|               | +LP + I +LSN+L L                                             |                          |             |             |           |
| Sbjct 889     | FNNFPELPYDCTEKIFSYLSNEDLRLLIDACK                             | 920                      |             |             |           |

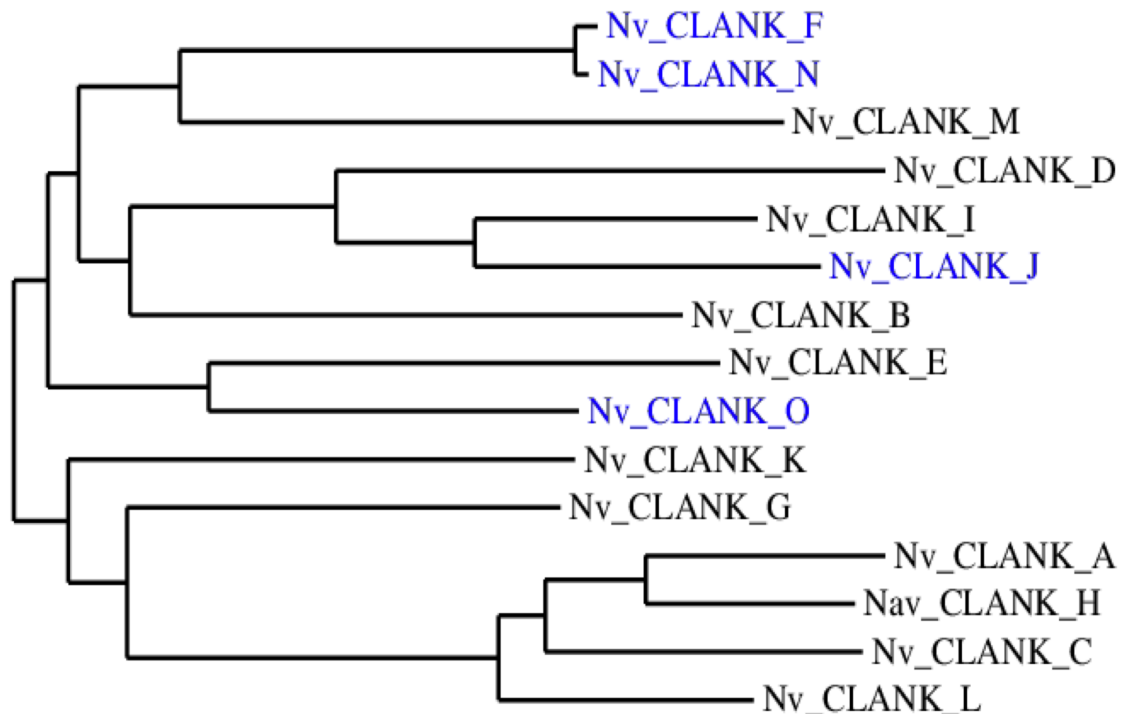

| Exp. | Chrm. | Exons  | Anks |
|------|-------|--------|------|
| D    | 5     | 4      | 12   |
| D    | 2     | 4      | 12   |
| V    | 3     | 1      | 10   |
|      | 5     | 3 or 2 | 7    |
| L    | 1     | 1      | 8    |
|      | 4     | 2      | 7    |
|      | 5     | 3      | 12   |
| L    | 1     | 2      | 7    |
| D    | 4     | 2      | 11   |
| L    | 4     | 3      | 13   |
| L    | 2     | 3      | 8    |
| L    | 5     | 3*     | 8    |
| L    | 5     | 3*     | 8    |
|      | 2     | 2      | 6    |
| G    | 5     | 2      | 8    |

0.7

Nv-CLANK-G

A1

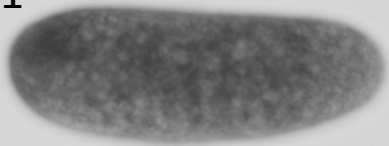

A2

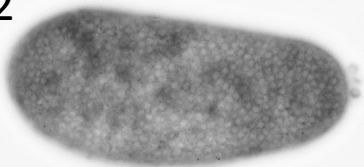

A3

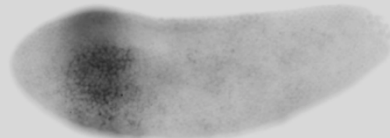

A4

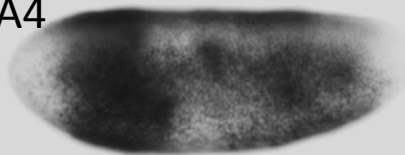

A5

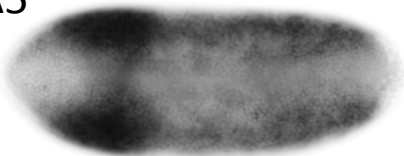

A6

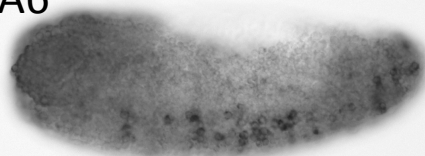

Nv-CLANK-H

B1

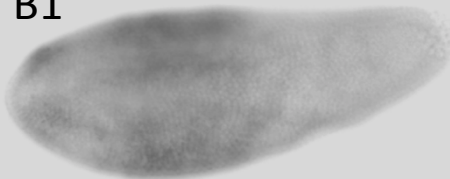

B2

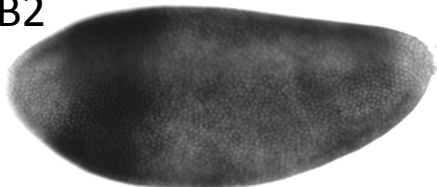

B3

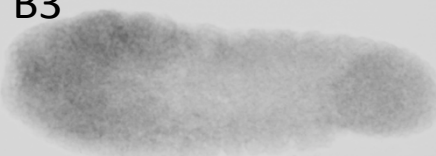

Nv-CLANK-K

C1

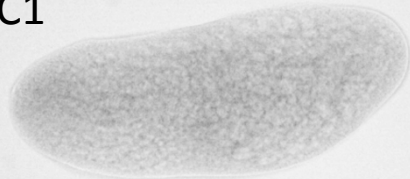

C2

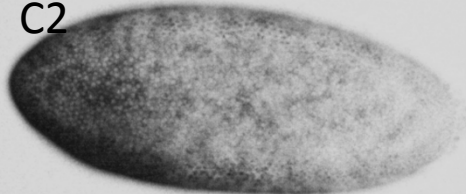

C3

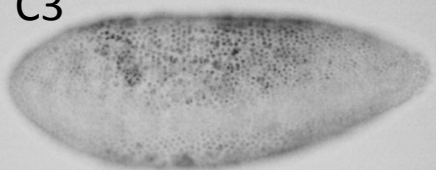

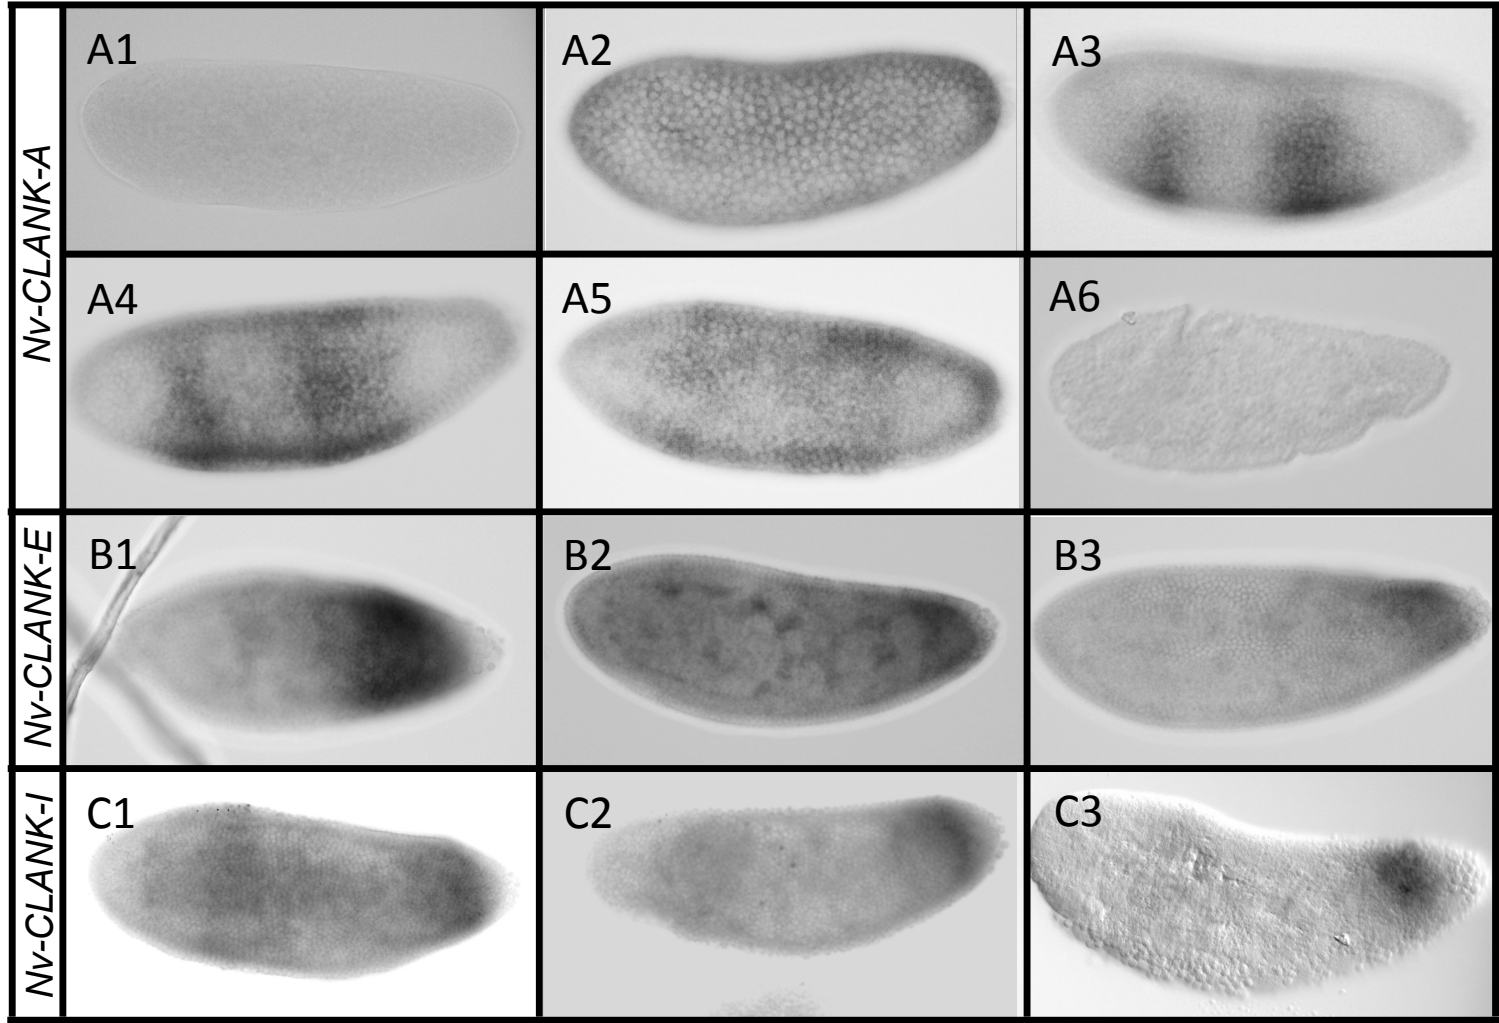



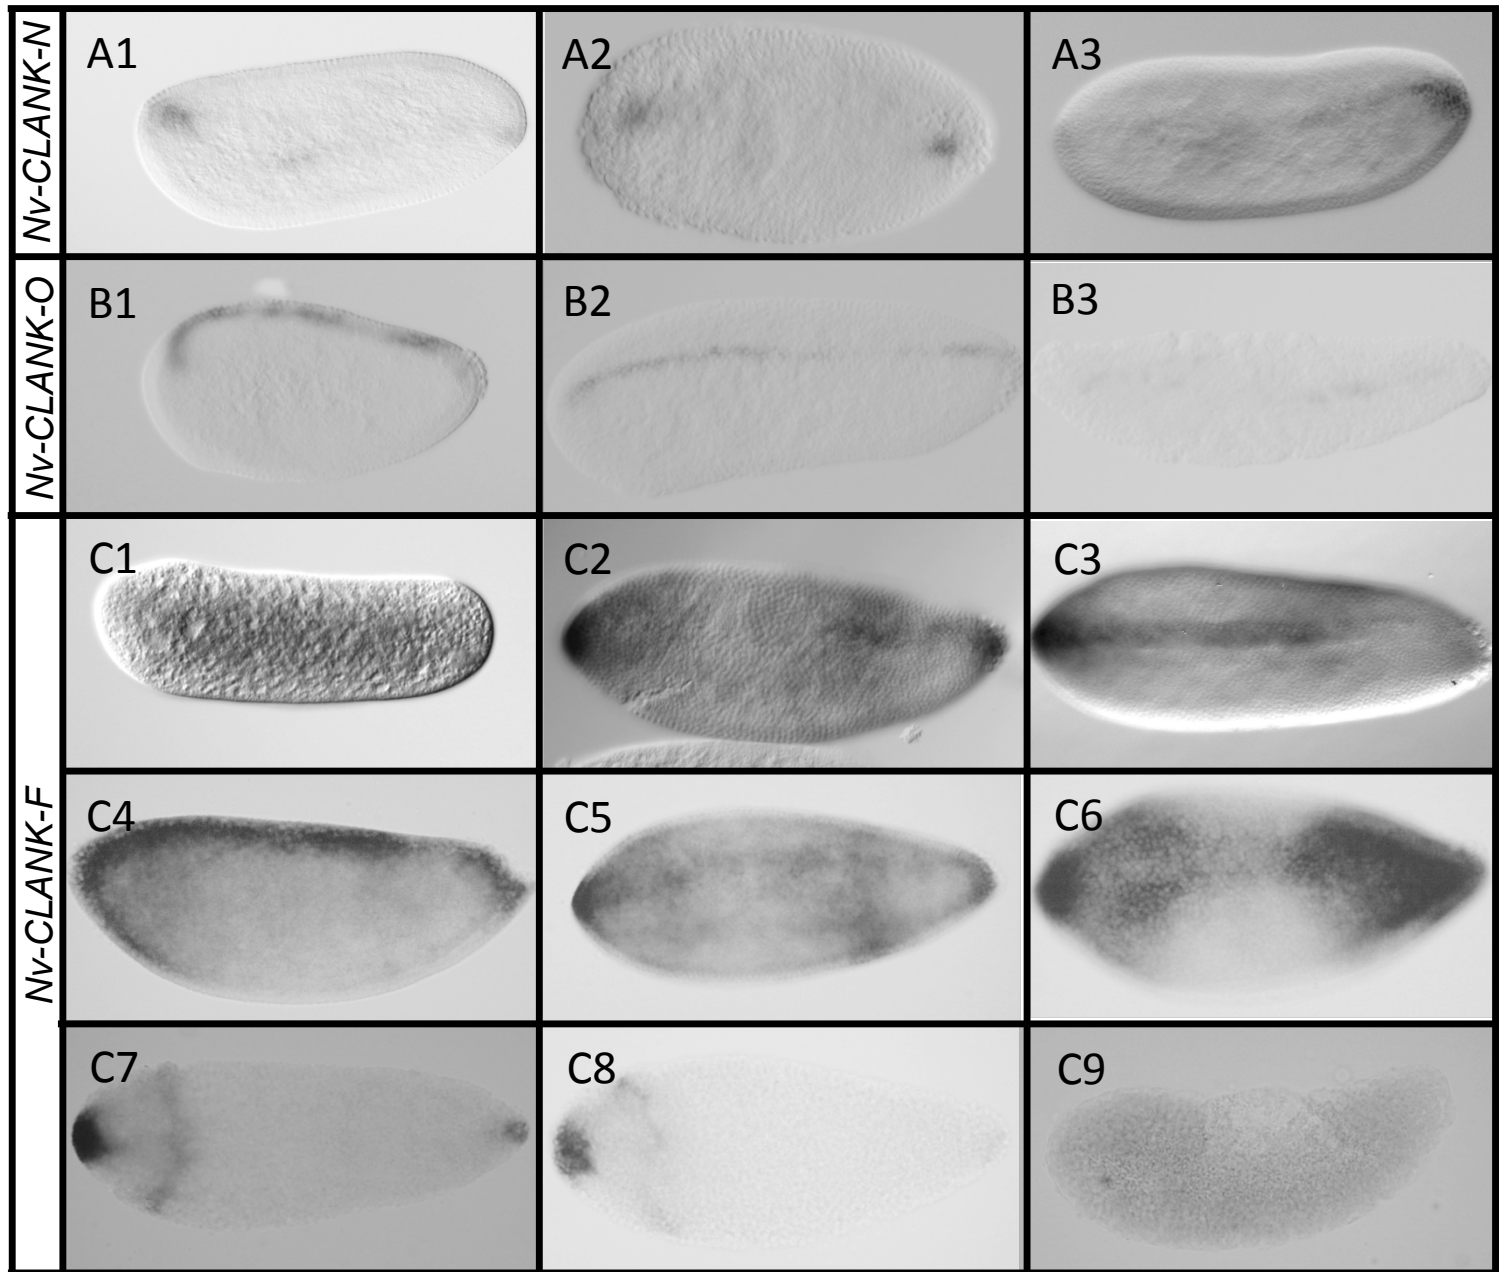

Nv-CLANK-M

A1

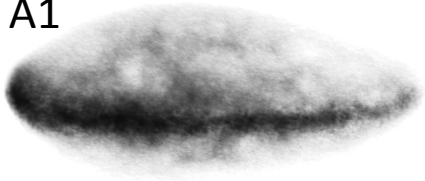

A2

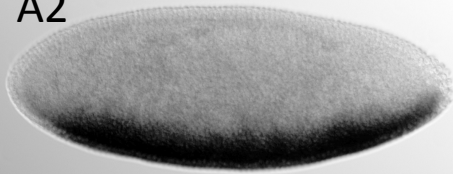

A3

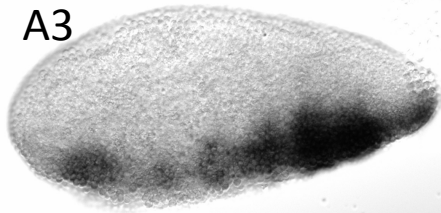

Nv-CLANK-L

B1

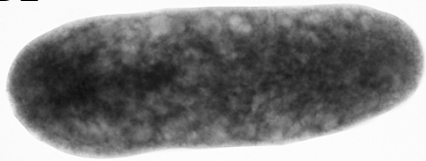

B2

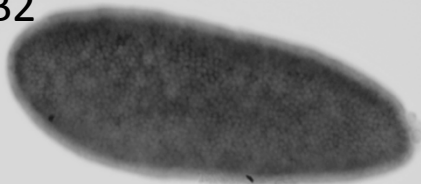

B3

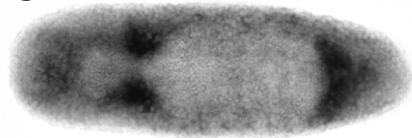

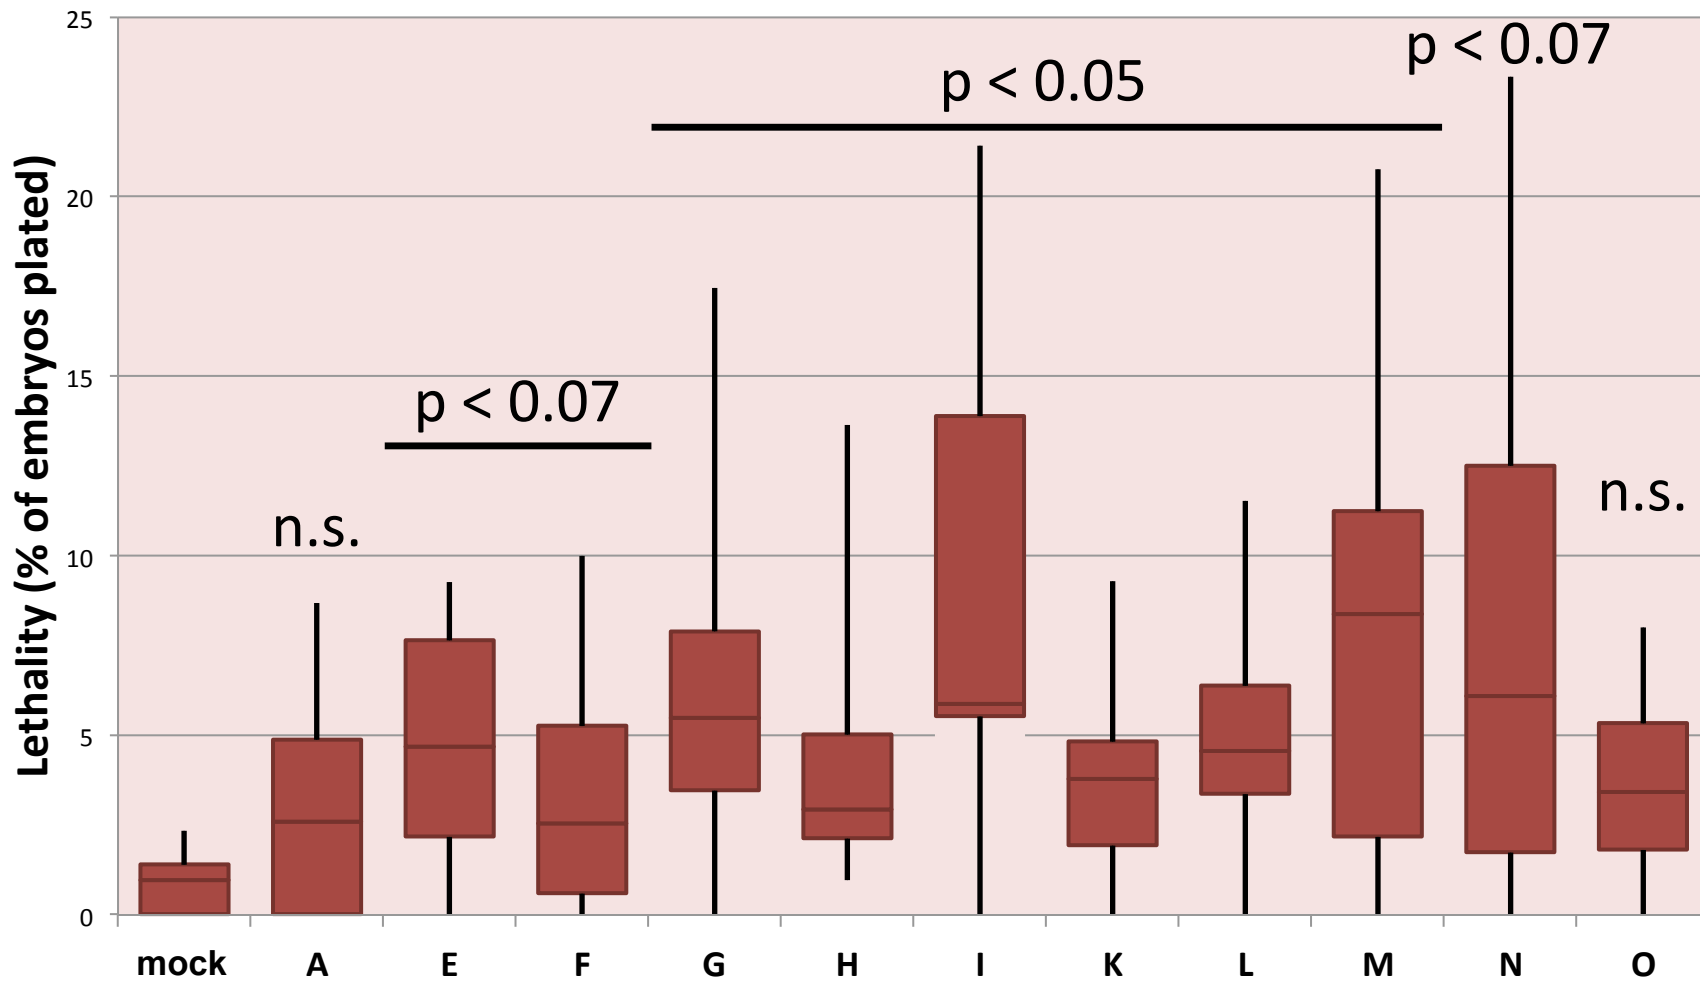

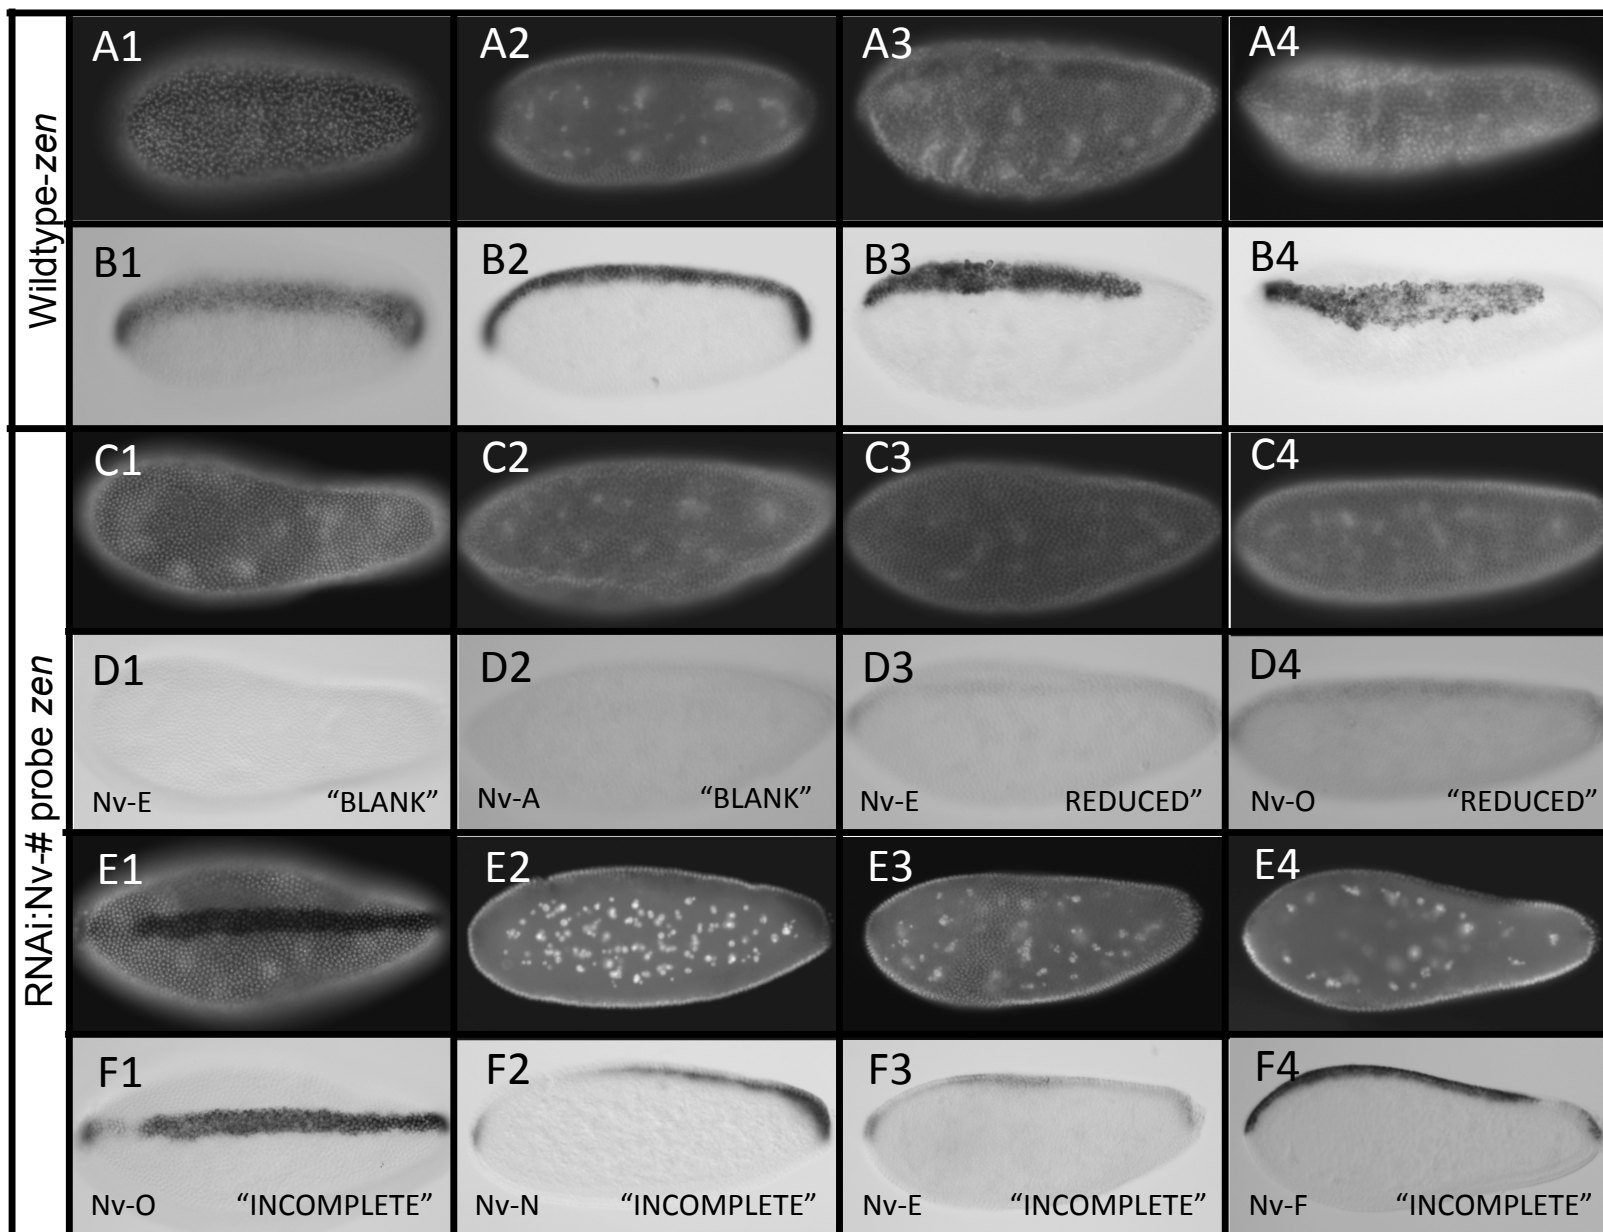

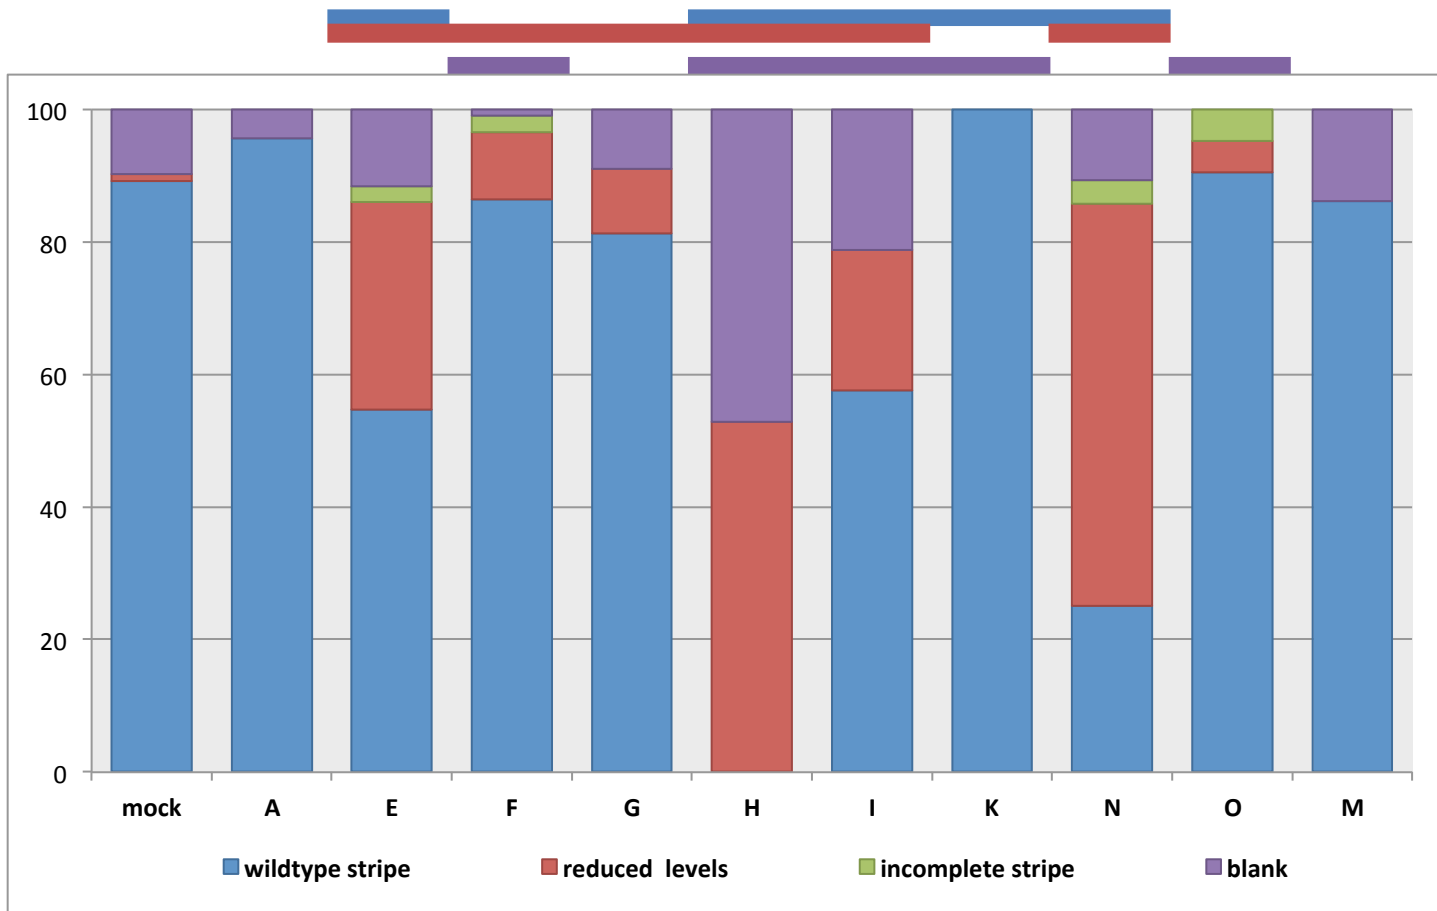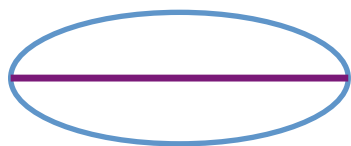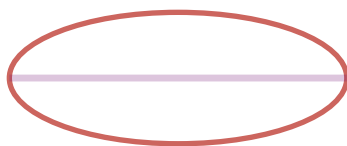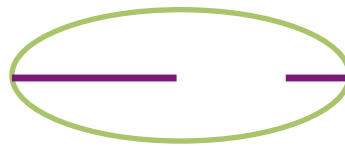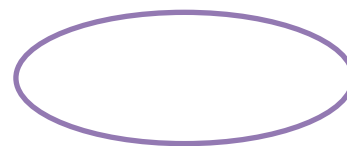

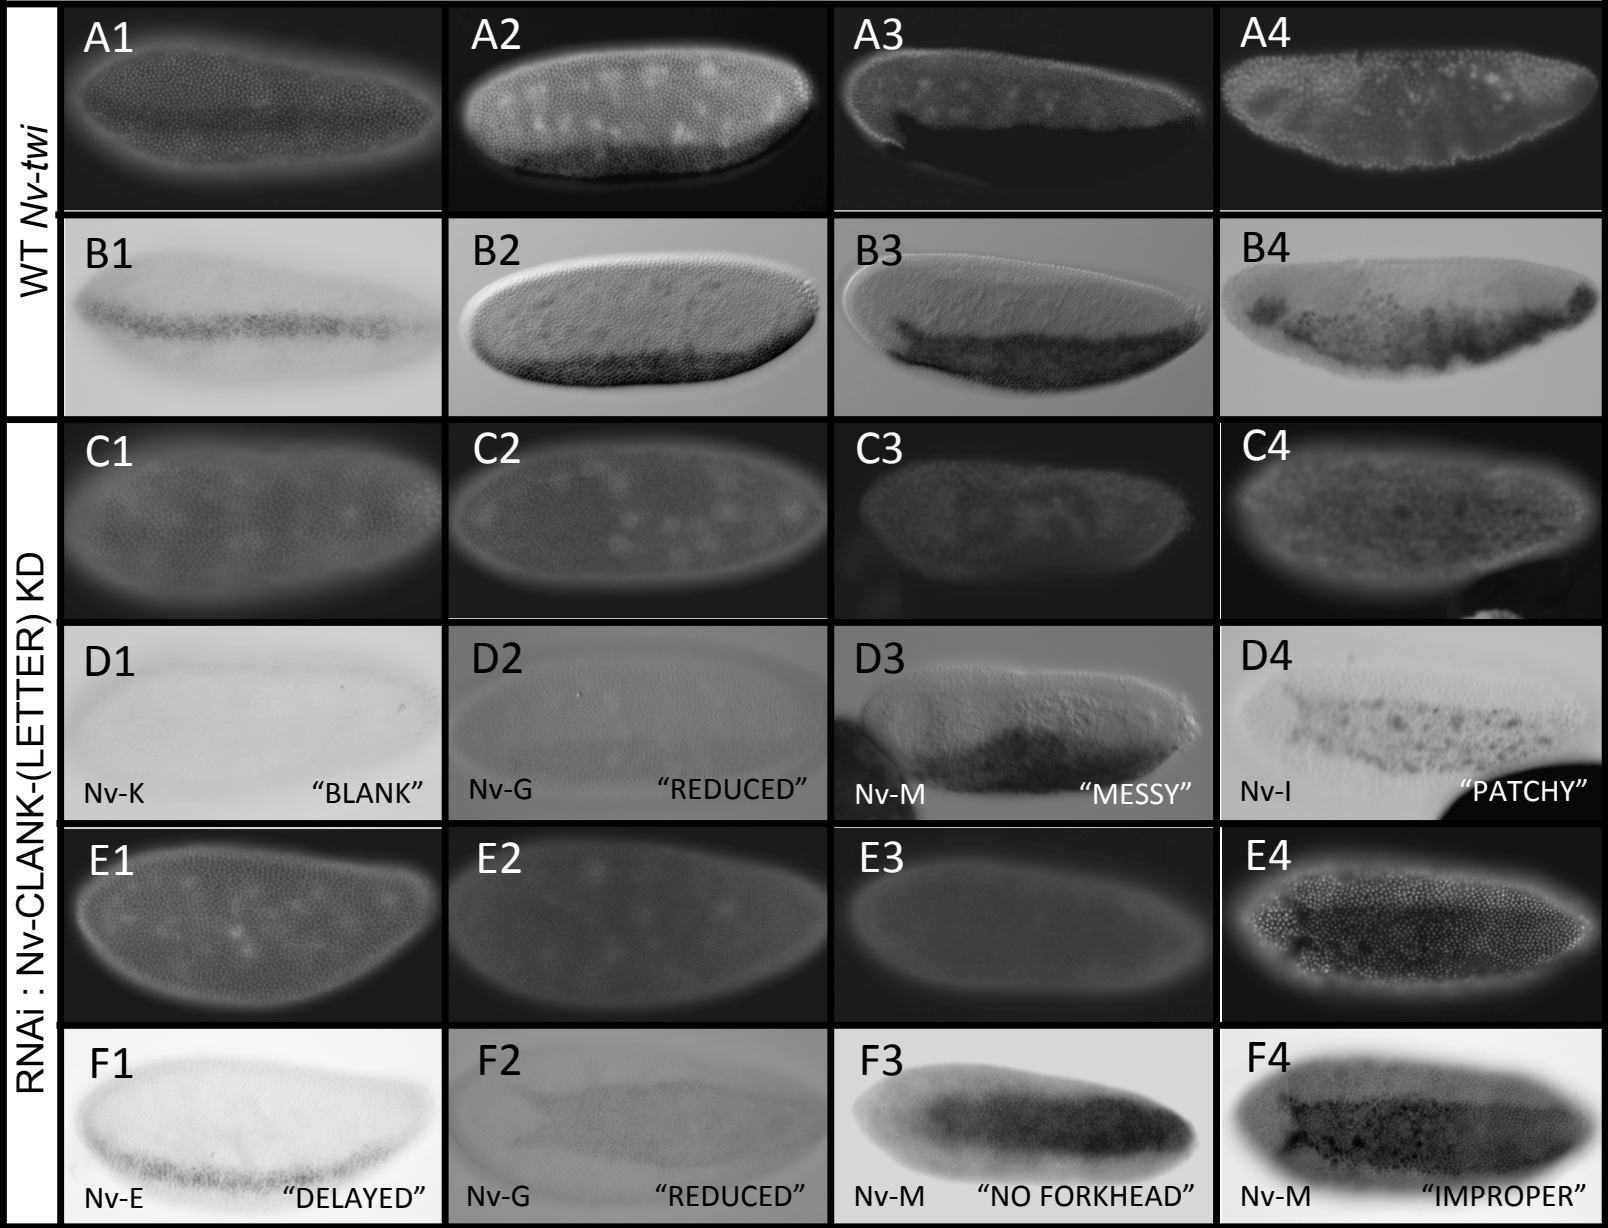

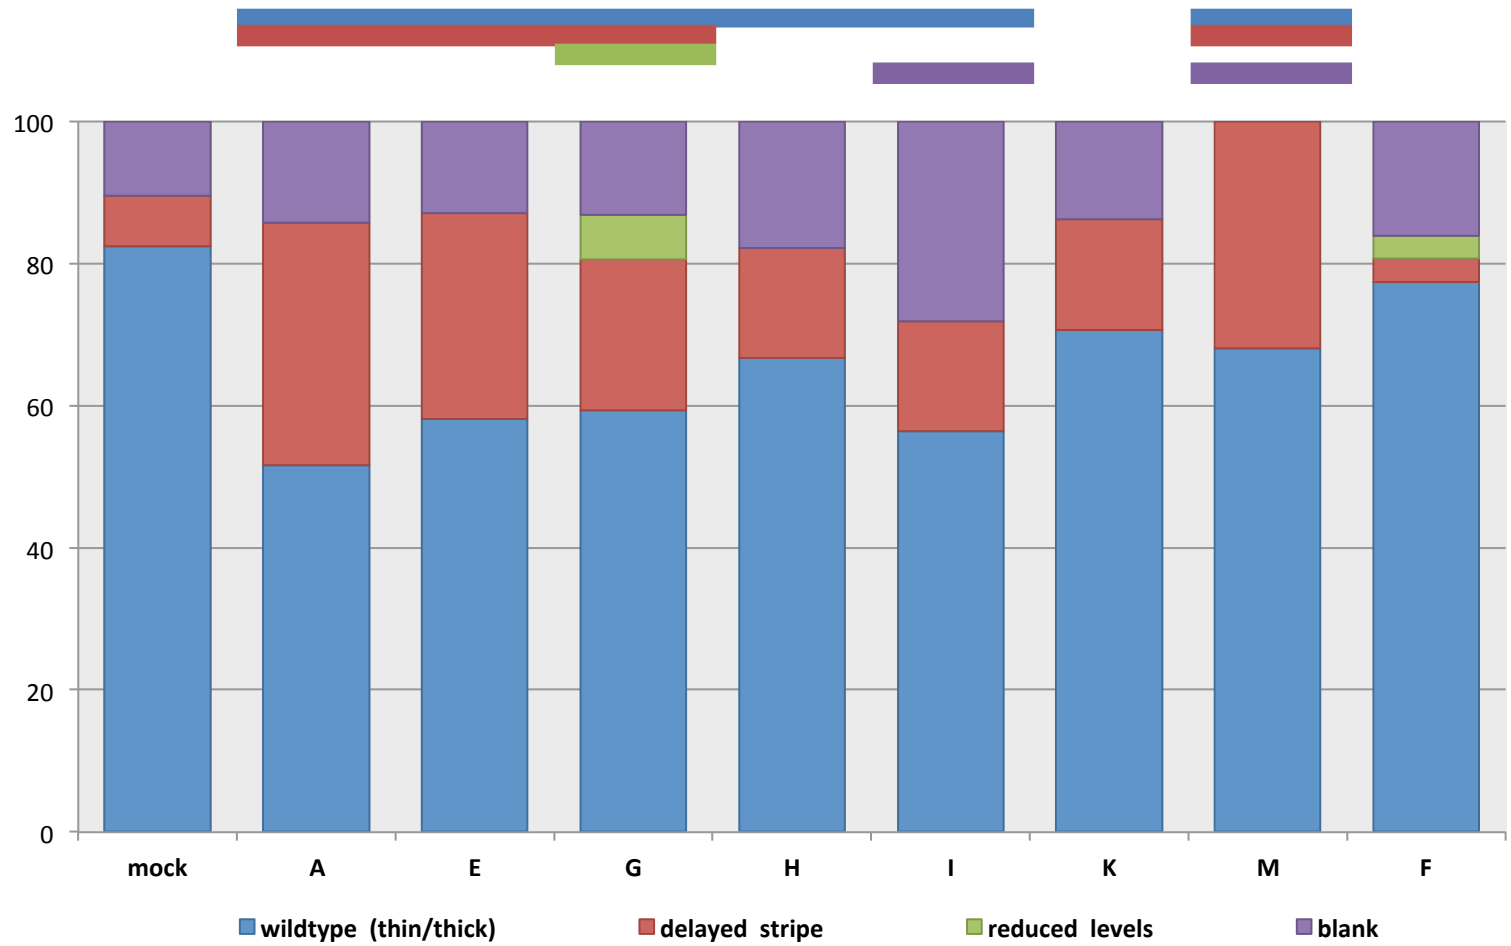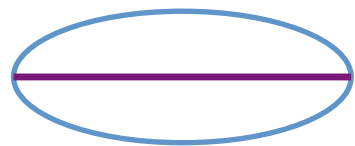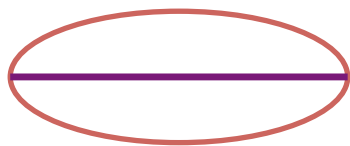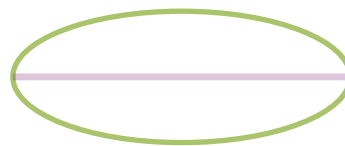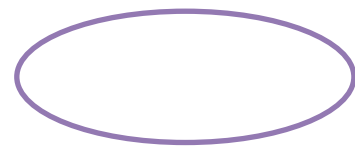

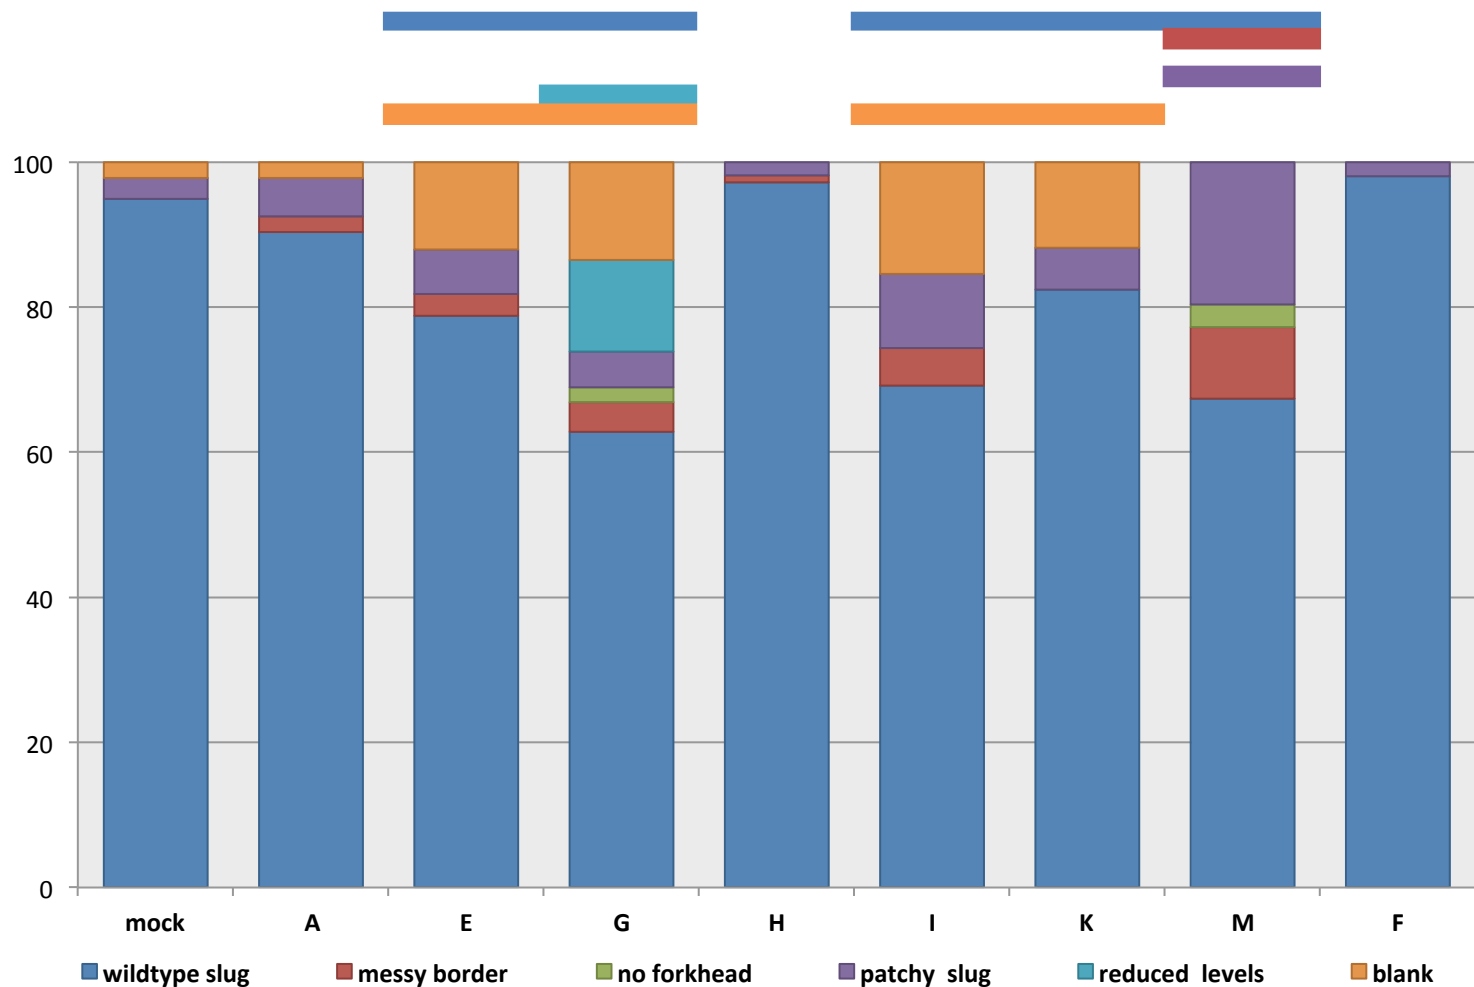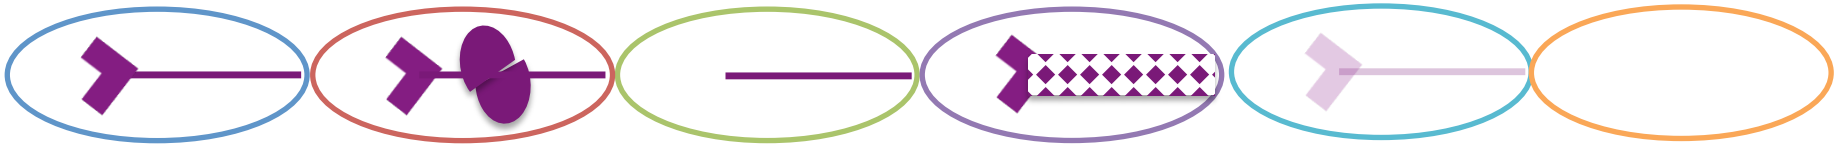



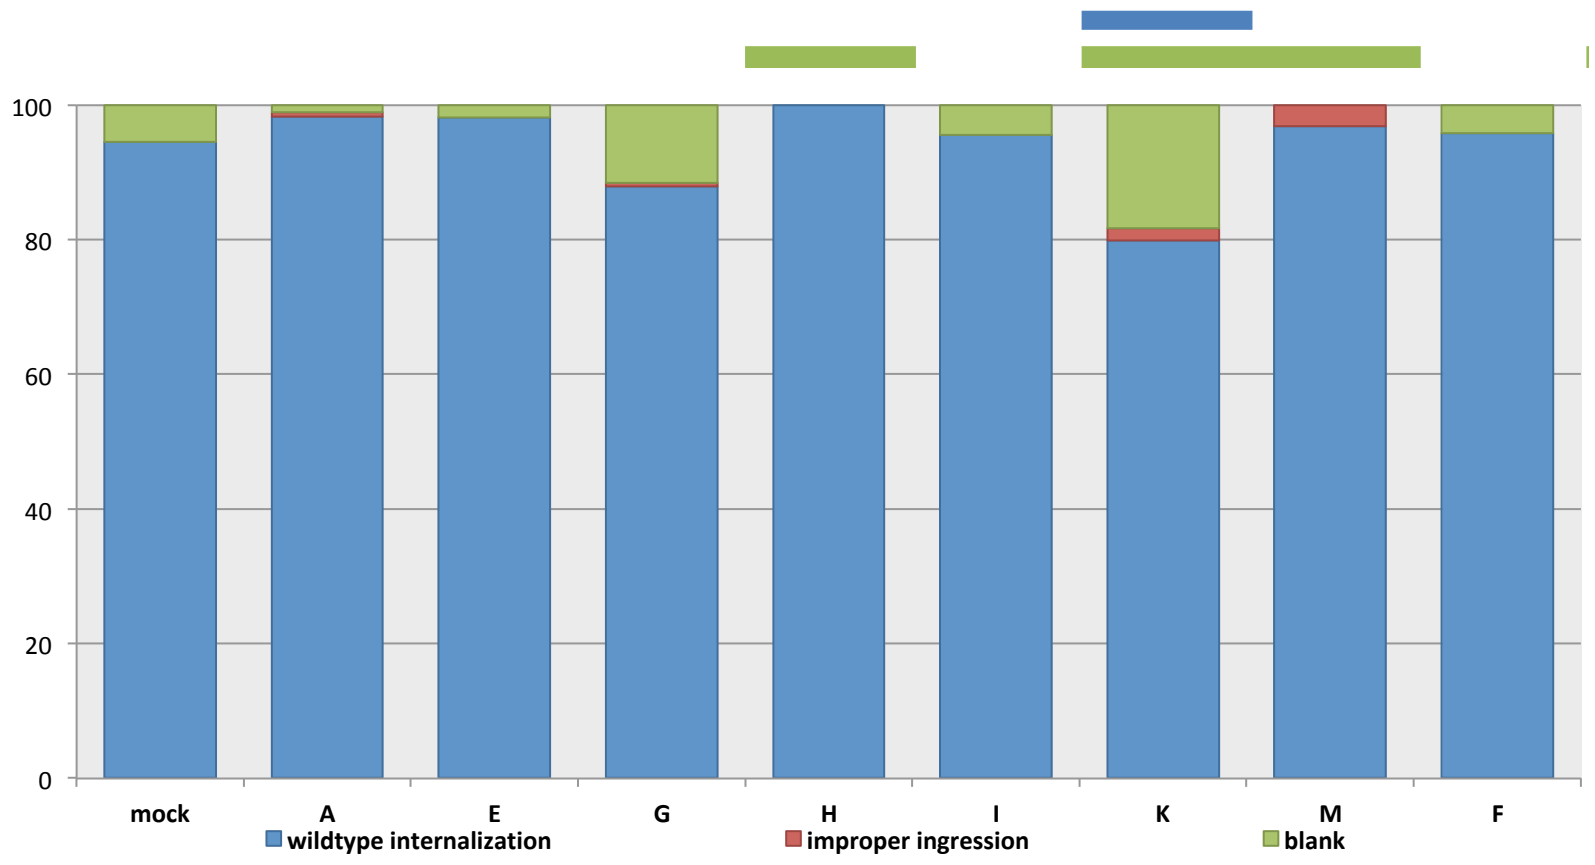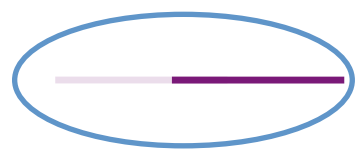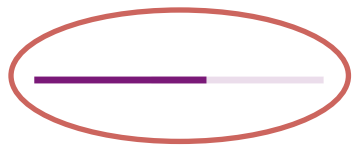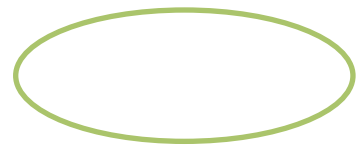

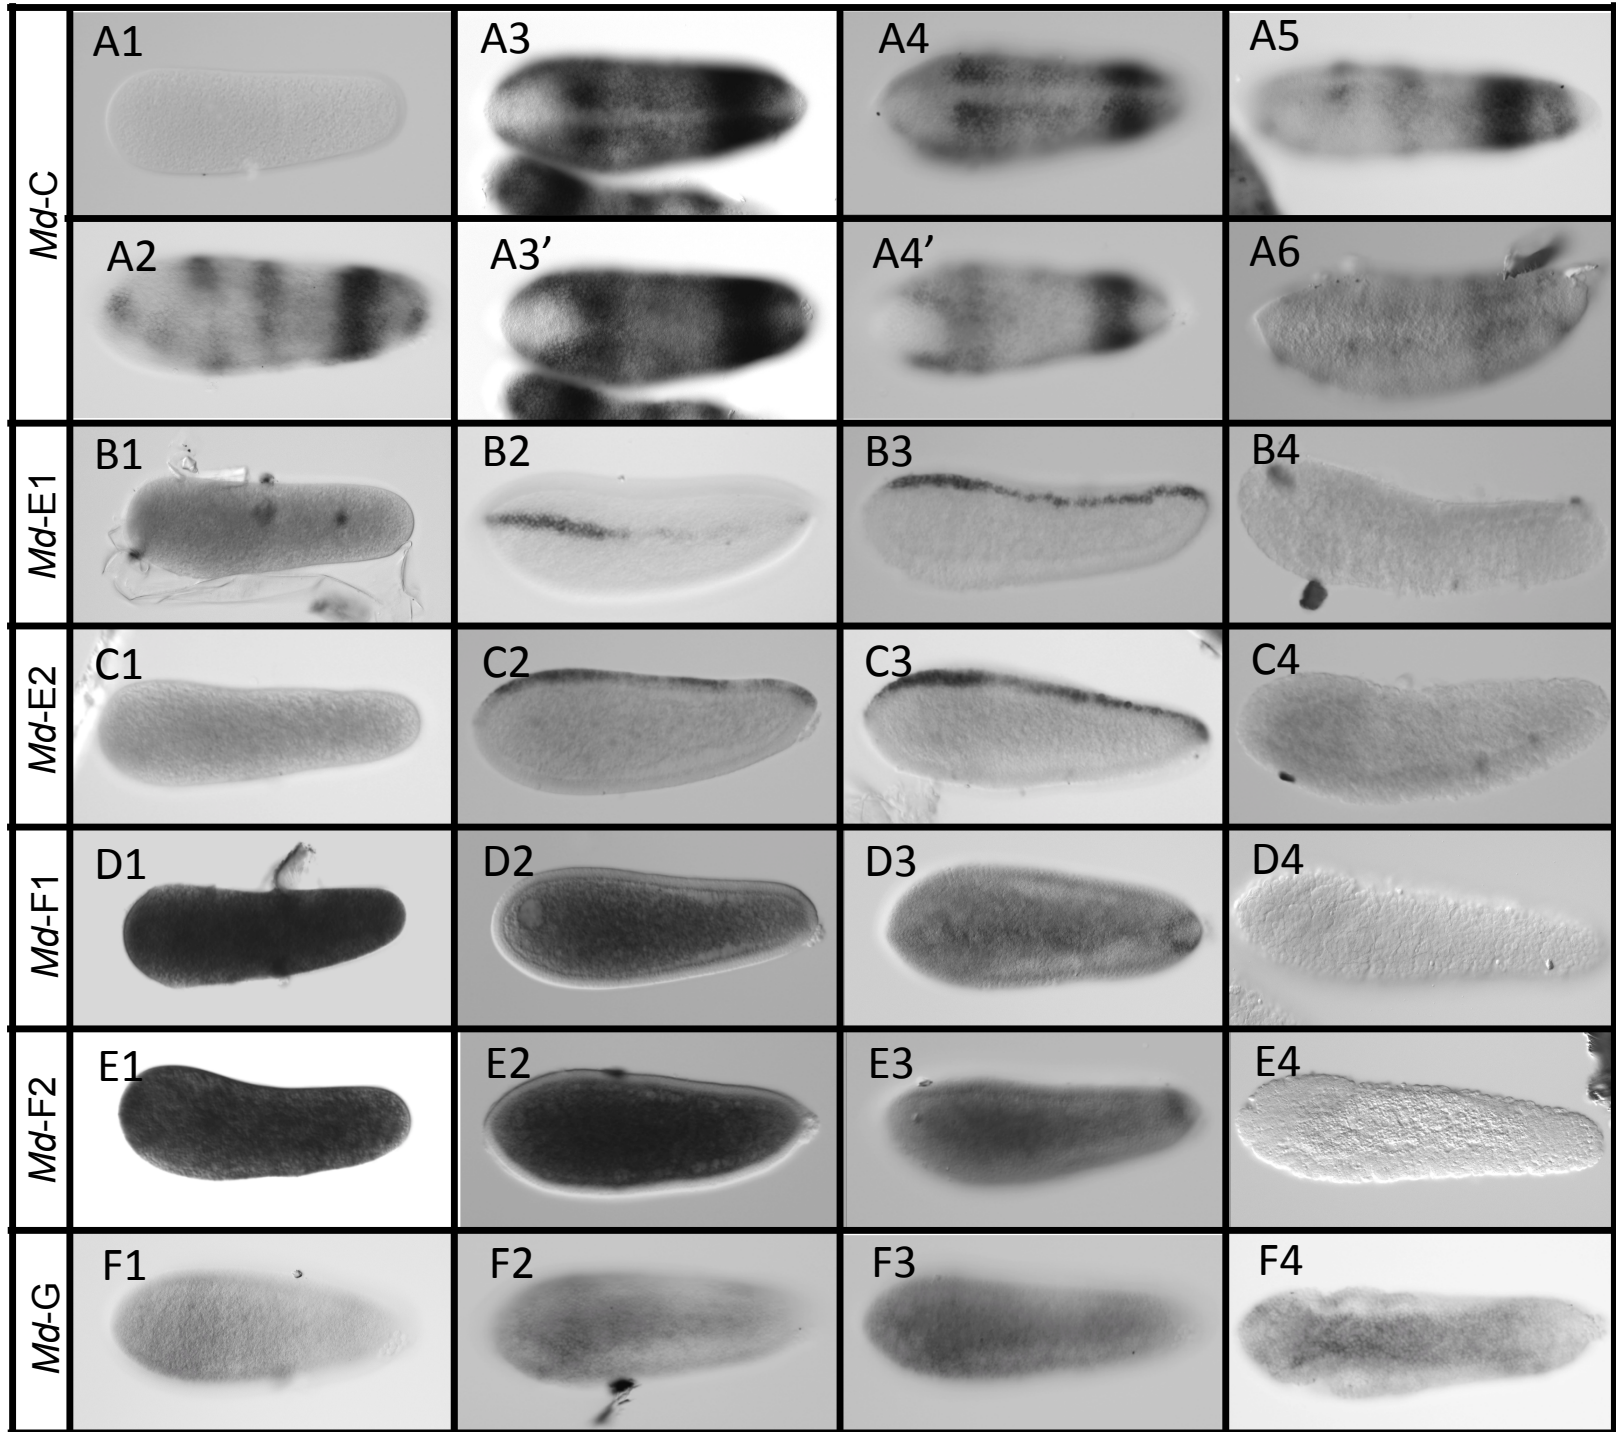

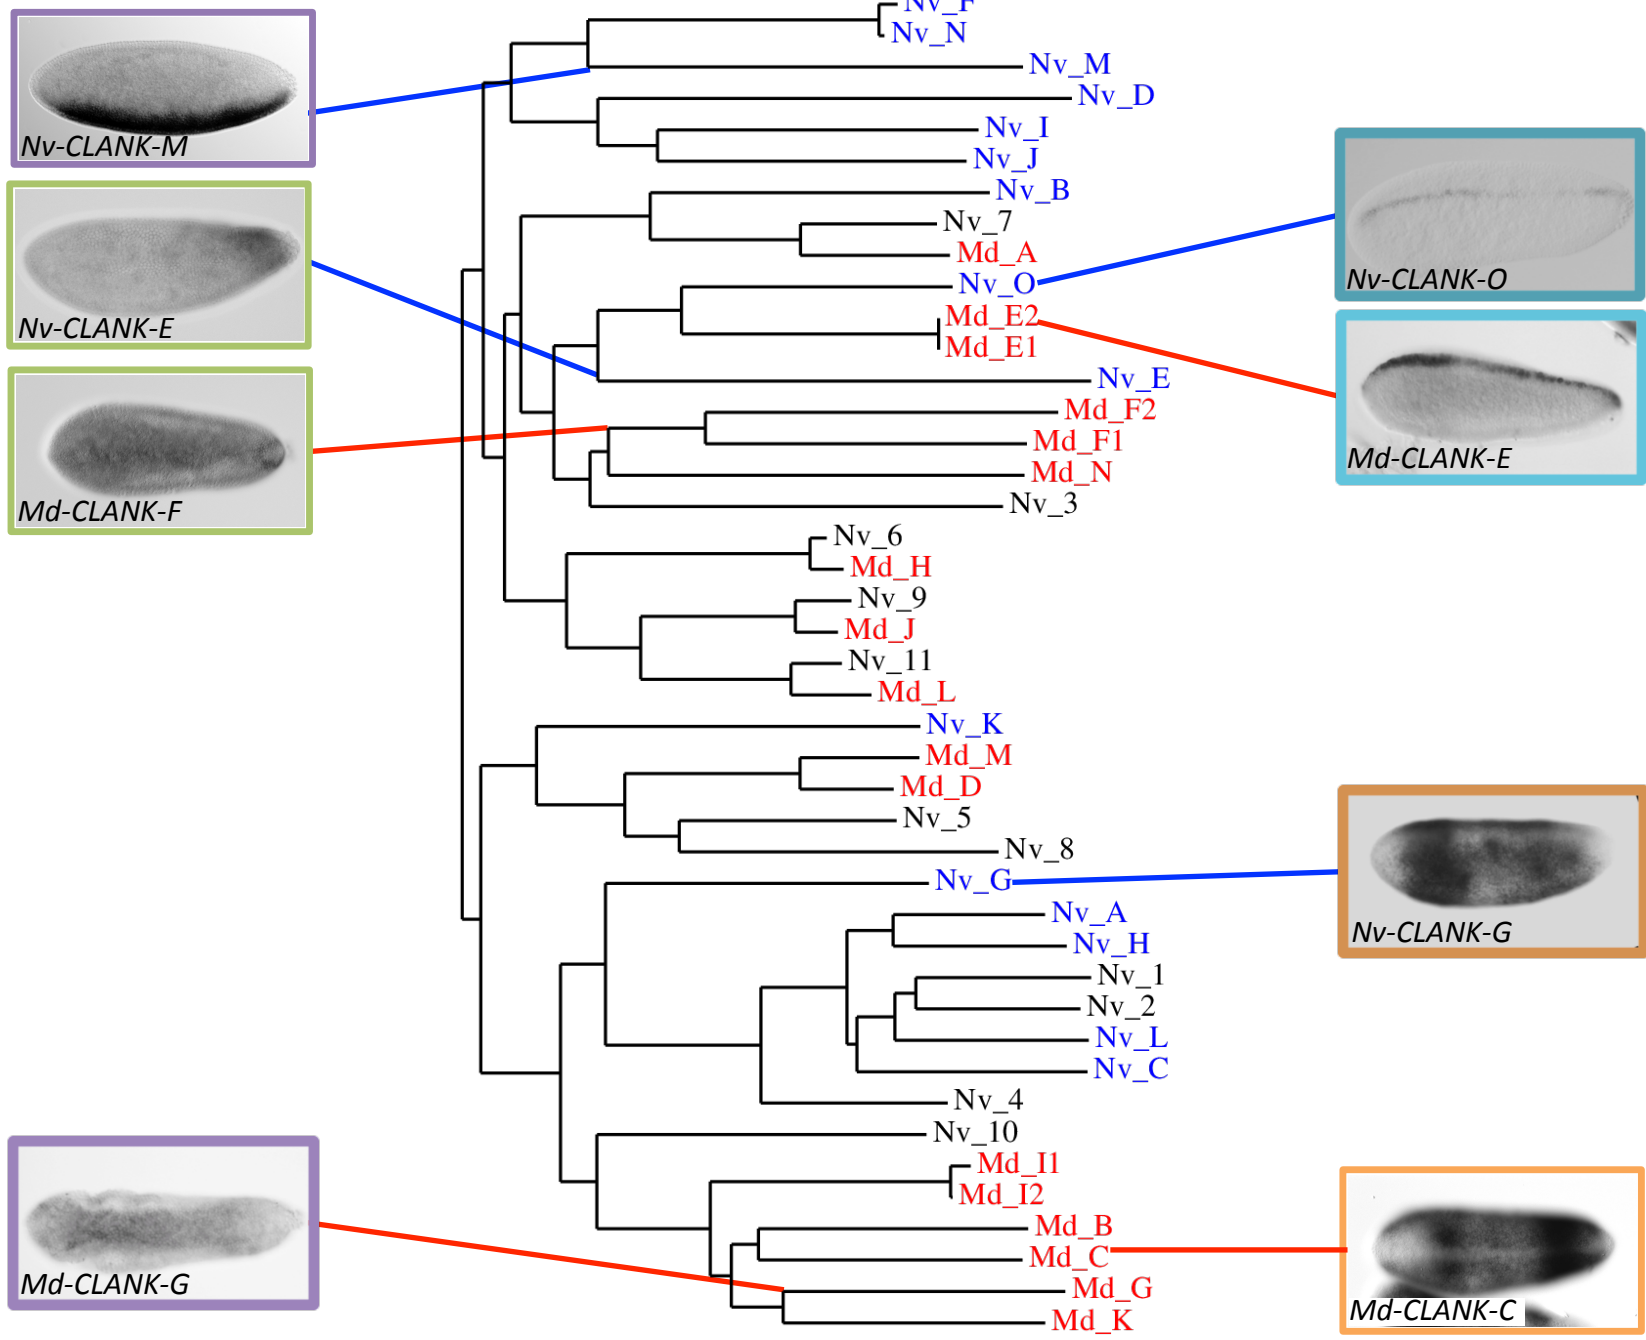

Source: https://www.biorxiv.org/content/10.1101/383968v1.full.pdf
